# Supplementary material
Source: publisher figshare collection journal article supplement (https://acs.figshare.com/ndownloader/files/5787858)

## Enzymatic Resolution of Bicyclic 1-Heteroaryl Amines Using Candida Antarctica Lipase B

*Krystyna A. Skupinska, Ernest J. McEachern,\* Ian R. Baird, Renato T. Skerlj, and Gary J. Bridger*

AnorMED Inc., #200-20353 64<sup>th</sup> Ave, Langley, BC, Canada V2Y 1N5

[emceachern@anormed.com](mailto:emceachern@anormed.com)

### Supporting Information

Table of Contents:

|                                                                             |     |
|-----------------------------------------------------------------------------|-----|
| Preparation of <b>1e</b> , <b>1f</b> , <b>1k</b> and <b>9</b>               | S3  |
| Thermal Racemization of ( <i>R</i> )- <b>2d</b> and ( <i>R</i> )- <b>2a</b> | S6  |
| Figure 1. <sup>1</sup> H NMR of <b>1c</b> .                                 | S7  |
| Figure 2. <sup>13</sup> C NMR of <b>1c</b> .                                | S8  |
| Figure 3. <sup>1</sup> H NMR of <b>1d</b> .                                 | S9  |
| Figure 4. <sup>13</sup> C NMR of <b>1d</b> .                                | S10 |
| Figure 5. <sup>1</sup> H NMR of <b>1e</b> .                                 | S11 |
| Figure 6. <sup>13</sup> C NMR of <b>1e</b> .                                | S12 |
| Figure 7. <sup>1</sup> H NMR of <b>1g</b> .                                 | S13 |
| Figure 8. <sup>13</sup> C NMR of <b>1g</b> .                                | S14 |
| Figure 9. <sup>1</sup> H NMR of <b>1k</b> .                                 | S15 |
| Figure 10. <sup>13</sup> C NMR of <b>1k</b> .                               | S16 |
| Figure 11. <sup>1</sup> H NMR of ( <i>R</i> )- <b>2e</b> .                  | S17 |
| Figure 12. <sup>13</sup> C NMR of ( <i>R</i> )- <b>2e</b> .                 | S18 |
| Figure 13. <sup>1</sup> H NMR of ( <i>R</i> )- <b>2f</b> .                  | S19 |
| Figure 14. <sup>13</sup> C NMR of ( <i>R</i> )- <b>2f</b> .                 | S20 |
| Figure 15. <sup>1</sup> H NMR of ( <i>S</i> )- <b>1i</b> .                  | S21 |

|                                                             |     |
|-------------------------------------------------------------|-----|
| Figure 16. $^1\text{H}$ NMR of ( <i>R</i> )- <b>2i</b> .    | S22 |
| Figure 17. $^{13}\text{C}$ NMR of ( <i>R</i> )- <b>2i</b> . | S23 |
| Figure 18. $^1\text{H}$ NMR of ( <i>S</i> )- <b>1j</b> .    | S24 |
| Figure 19. $^1\text{H}$ NMR of ( <i>R</i> )- <b>2j</b> .    | S25 |
| Figure 20. $^{13}\text{C}$ NMR of ( <i>R</i> )- <b>2j</b> . | S26 |
| Figure 21. $^1\text{H}$ NMR of ( <i>R</i> )- <b>2k</b> .    | S27 |
| Figure 22. $^{13}\text{C}$ NMR of ( <i>R</i> )- <b>2k</b> . | S28 |
| Figure 23. $^1\text{H}$ NMR of ( <i>S</i> )- <b>1l</b> .    | S29 |
| Figure 24. $^1\text{H}$ NMR of ( <i>R</i> )- <b>2l</b> .    | S30 |
| Figure 25. $^{13}\text{C}$ NMR of ( <i>R</i> )- <b>2l</b> . | S31 |

**5,6,7,8-Tetrahydroquinoxalin-5-ylamine (1e).** To a solution of 5,6,7,8-tetrahydroquinoxaline **5** (3.08 g, 23.0 mmol) in CCl<sub>4</sub> (200 mL) was added *N*-bromosuccinamide (4.09 g, 23.0 mmol) and a catalytic amount (56 mg) of benzoyl peroxide. The reaction mixture was heated at reflux for 17 hours. Saturated sodium bicarbonate solution was added (100 mL), the layers were separated and the aqueous phase was extracted with CH<sub>2</sub>Cl<sub>2</sub> (2 x 200 mL). The organic extracts were dried and concentrated. The crude material contained 1:3:1 ratio (GC) of starting material, mono- and dibromo products which were separated by column chromatography on silica gel using a mixture of 1:1 EtOAc:hexanes to give 5-bromo-5,6,7,8-tetrahydroquinoxaline (3.03 g, 54%) as a brown liquid: <sup>1</sup>H NMR δ 1.99-2.03 (m, 1H), 2.20-2.49 (m, 3H), 2.97-3.10 (m, 1H), 3.11-3.20 (m, 1H), 5.48 (t, 1H, *J* = 1.5 Hz), 8.40 (s, 2H). It should be noted that this material is unstable when exposed to air over 2-3 days and was used immediately in the next reaction.

5-bromo-5,6,7,8-tetrahydroquinoxaline (2.75 g, 12.9 mmol) and sodium azide (1.68 g, 25.8 mmol) were dissolved in DMF (50 mL) under nitrogen atmosphere and the reaction mixture was warmed to 60 °C for 2 days. The mixture was cooled to room temperature and poured over water (500 mL), and was extracted with CH<sub>2</sub>Cl<sub>2</sub> (3 x 300 mL). The organic extracts were washed with brine (2 x 200 mL), dried and concentrated *in vacuo*. The crude material was purified by flash column chromatography on silica gel using 1:1 EtOAc/hexanes to afford 2.19 g (97%) of 5-azido-5,6,7,8-tetrahydroquinoxaline as a yellow liquid which displayed: <sup>1</sup>H NMR δ 1.80-1.96 (m, 1H), 2.00-2.10 (m, 3H), 2.75-3.06 (m, 2H), 4.74 (t, 1H, *J* = 6.5 Hz), 8.44 (d, 1H, *J* = 3 Hz), 8.45 (d, 1H, *J* = 3 Hz); <sup>13</sup>C NMR δ 18.6, 28.9, 31.7, 60.2, 142.6, 144.3, 150.3, 153.6. A Parr shaker flask was charged with 5-azido-5,6,7,8-tetrahydroquinoxaline (1.81 g, 10.33 mmol) and 10% palladium on carbon (10 wt% of Pd/C; 0.18 g). The reaction vessel was evacuated and filled with nitrogen. Methanol (30 mL) was added and the reaction was hydrogenated at 30 psi for 40 minutes. The reaction mixture was flushed with nitrogen and filtered through a plug of Celite® to provide 5,6,7,8-tetrahydroquinoxalin-5-ylamine (**1e**) as a orange liquid (1.54 g, 99%), which would rapidly turn dark brown. It was stored under an argon atmosphere at -20 °C. <sup>1</sup>H NMR δ 1.62-1.79 (m, 1H), 1.80-2.18 (m, 4H), 2.18-

2.30 (m, 1H), 2.91-3.01 (m, 2H), 4.07 (dd, 1H,  $J = 8.4, 5.4$  Hz), 8.32-8.38 (m, 2H);  $^{13}\text{C}$  NMR  $\delta$  19.7, 31.7, 32.2, 51.5, 142.0, 142.5, 152.6, 155.4; MS  $m/z$ : 150 ( $\text{M}+\text{H}^+$ ), 133.

**3,4-Dihydro-2H-pyrano[3,2-b]pyridin-4-ylamine (1f).** To a solution of 2,3,-dihydropyrano[3,2-b]pyridin-4-one<sup>1</sup> (841 mg, 5.64 mmol) in MeOH (15 mL) was added hydroxylamine hydrochloride (470 mg, 6.77 mmol) and the reaction mixture was stirred at room temperature overnight. Aqueous saturated  $\text{NaHCO}_3$  solution was added until the pH of the mixture was  $\sim 7$  and it was extracted with  $\text{CH}_2\text{Cl}_2$  (5 x 50 mL). The organic extracts were washed with brine (2 x 200 mL), were dried ( $\text{MgSO}_4$ ), filtered and concentrated *in vacuo* to provide 924 mg of the oxime. To a cool (0 °C) suspension of the oxime in a mixture of ethanol (5 mL), ammonium hydroxide solution (26 mL) and ammonium acetate (488 mg, 6.32 mmol) was added zinc powder portion-wise. The reaction mixture was warmed to room temperature and stirred for 17 hours. The mixture was filtered through a plug of glass wool and washed with  $\text{H}_2\text{O}$  (30 mL), extracted with  $\text{CH}_2\text{Cl}_2$  (3 x 50 mL), washed with brine, dried ( $\text{MgSO}_4$ ), filtered and concentrated to yield 3,4-dihydro-2H-pyrano[3,2-b]pyridin-4-ylamine (**1f**) as a pink liquid (743 mg, 86%) which displayed:  $^1\text{H}$  NMR  $\delta$  1.84 (br s, 2H), 1.90-2.01 (m, 1H), 2.24-2.34 (m, 1H), 4.12 (dd, 1H,  $J = 5.7, 6.9$  Hz), 4.18-4.26 (m, 1H), 4.28-4.36 (m, 1H), 7.06-7.13 (m, 2H), 8.15 (dd, 1H,  $J = 1.8, 3.6$  Hz);  $^{13}\text{C}$  NMR  $\delta$  31.5, 47.8, 64.2, 123.8, 124.5, 142.1, 147.0, 151.1; MS  $m/z$ : 151.0 ( $\text{M}+\text{H}^+$ ), 134.0 ( $\text{M}-\text{NH}_2$ ); Anal. Calc. for  $\text{C}_8\text{H}_{10}\text{N}_2\text{O} \cdot 0.1\text{H}_2\text{O}$ : C, 63.22; H, 6.76; N, 18.43. Found: C, 62.99; H, 6.81; N, 18.22.

**4,5,6,7-tetrahydrobenzofuran-7-ylamine (1k).** To a 0 °C solution of 4,5,6,7-tetrahydrobenzofuran-7-ol<sup>2</sup> (1.20 g, 8.69 mmol) in toluene (50 mL) was added DBU (3.89 mL, 26.1 mmol) and diphenyl phosphorazidate (5.60 mL, 26.1 mmol).<sup>3</sup> The reaction mixture was warmed to room temperature and was stirred for 1 hour. The resulting two-phase mixture was washed with  $\text{NaHCO}_3$  (50 mL) and was extracted with  $\text{CH}_2\text{Cl}_2$  (3 x 50 mL). The organic extracts were dried ( $\text{MgSO}_4$ ) and concentrated *in vacuo*. The crude material was purified by flash column chromatography on silica gel

<sup>1</sup> Bridger, G.; Skerlj, R.; Kaller, A.; Harwig, C.; Bogucki, D.; Wilson, T. R.; Crawford, J.; McEachern, E. J., Astma, B.; Nan, S.; Zhou, Y.; Schols, D.; Smith, C. D.; DiFluri, R. PCT Int.Appl. **2002**, WO 0222600.

<sup>2</sup> Seki, M.; Sakamoto, T.; Suemune, H.; Kanematsu, K. *J. Chem. Soc., Perkin Trans. 1* **1997**, 1707-1714.

<sup>3</sup> Thompson, A. S.; Humphrey, G. R.; DeMarco, A. M.; Mathre, D. J.; Grabowski, E. J. *J. Org. Chem.* **1993**, 58, 5886-5888.

using a 1:4 EtOAc/hexanes mixture and upon removal of traces of solvent on high vacuum 7-azido-4,5,6,7-tetrahydrobenzofuran was obtained as a clear liquid (0.89 g, 63%). This compound was found to be volatile when subjected to reduced pressure.  $^1\text{H}$  NMR  $\delta$  1.71-1.91 (m, 2H), 1.92-2.08 (m, 2H), 2.31-2.46 (m, 1H), 2.55 (dt, 1H,  $J$  = 16.2, 5.0 Hz), 4.59 (t, 1H,  $J$  = 4.5 Hz), 6.24 (d, 1H,  $J$  = 1.8 Hz), 7.35 (d, 1H,  $J$  = 1.8 Hz);  $^{13}\text{C}$  NMR  $\delta$  19.9, 22.3, 30.4, 54.3, 110.7, 121.8, 143.1, 147.8; MS  $m/z$ : 121 ( $\text{M}-\text{N}_3$ ). To a flask charged with 7-azido-4,5,6,7-tetrahydrobenzofuran (405 mg, 2.48 mmol) and Pd/C (10 wt% Pd/C; 44 mg) was added MeOH. The reaction mixture was flushed with hydrogen and was hydrogenated for 1 hour at room temperature. The mixture was purged with nitrogen gas and was filtered through a plug of Celite®, concentrated *in vacuo* and purified by chromatography on silica gel to yield 4,5,6,7-tetrahydrobenzofuran-7-ylamine (**1k**) (205 mg, 60%) as a clear liquid which was volatile when subjected to high vacuum.  $^1\text{H}$  NMR  $\delta$  1.50-1.75 (m, 4H), 1.76-1.90 (m, 1H), 2.01-2.20 (m, 1H), 2.30-2.50 (m, 2H), 3.94 (t, 1H,  $J$  = 5.7 Hz), 6.17 (d, 1H,  $J$  = 1.5 Hz), 7.26 (d, 1H,  $J$  = 1.5 Hz);  $^{13}\text{C}$  NMR  $\delta$  21.1, 22.6, 34.0, 45.5, 110.5, 117.9, 141.3, 153.6; MS  $m/z$ : 160 ( $\text{M}+\text{Na}^+$ ).

**Preparation of 9.** (*S*)-8-amino-5,6,7,8-tetrahydroquinoline ((*S*)-**1b**) (66 mg, 0.44 mmol) dissolved in acetonitrile (2 mL) was added via syringe to a purple solution of chlorooxo[[2,2'-(thio- $\bullet$ S)]bis[ethanethiolato- $\bullet$ S]](2-)]-rhenium (117 mg, 0.30 mmol) in acetonitrile (20 mL) at room temperature under argon. Upon addition of the amine the reaction mixture immediately turned dark green. The mixture was stirred at room temperature for 1 hour to yield a green precipitate, which was isolated via suction filtration, washed with acetonitrile (2 x 5 mL) and dried *in vacuo* (84 mg, 55 %). X-ray quality crystals were grown under argon using a two-chamber slow diffusion apparatus. Slow diffusion of diethyl ether into a chloroform solution of **9** yielded green/brown crystals. Of note, **9** appears to be relatively stable in the solid state; however, if it is dissolved in the presence of air it will rapidly decompose.  $^1\text{H}$  NMR ( $\text{CD}_2\text{Cl}_2$ , 300 MHz)  $\delta$  1.90-2.30 (m, 6H), 2.42 (m, 1H), 2.65 (m, 1H), 2.88 (m, 2H), 2.99 (m, 1H), 3.72 (br t, 2H), 3.84 (dm, 1H), 4.68 (m, 1H), 7.32 (dd, 1H,  $J$  = 5.7, 2.6 Hz), 7.67 (d, 1H,  $J$  = 8.1 Hz), 8.94 (d, 1H,  $J$  = 6.0 Hz), 9.15 (br s, 1H); MS  $m/z$ : 503 ( $\text{M}+\text{H}^+$ ). IR (KBr)  $\nu$  ( $\text{cm}^{-1}$ )

886 (Re=O). Anal. Calcd. for  $C_{13}H_{19}N_2OS_3Re \cdot 0.1C_2H_3N \cdot 0.5H_2O$ : C, 30.80, H, 3.97; N, 5.71; S, 18.68. Found: C, 30.67; H, 3.84; N, 5.96; S, 18.75.

**Thermal Racemization of (*R*)-2d and (*R*)-2a**

(*R*)-5,6,7,8-*N*-(Tetrahydroisoquinolin-5-yl)acetamide ((*R*)-**2d**) (60 mg; 94% ee determined by chiral GC) was placed in a sealed pressure tube flushed with argon. The reaction tube was placed in a hot (150 °C) oil bath until the starting material melted and heating was continued for 2 hours. The material at this point (60 mg recovery, quant. yield) had an enantiomeric excess of 0% and its  $^1H$  NMR was unchanged in comparison with the starting material.

Racemization of (*R*)-1-pyridin-2-ylethylamine ((*R*)-**2a**) (242 mg, 79%ee) provided after 5 days of heating at 150 °C, **2a** (242 mg) in 9%ee.

Figure 1.

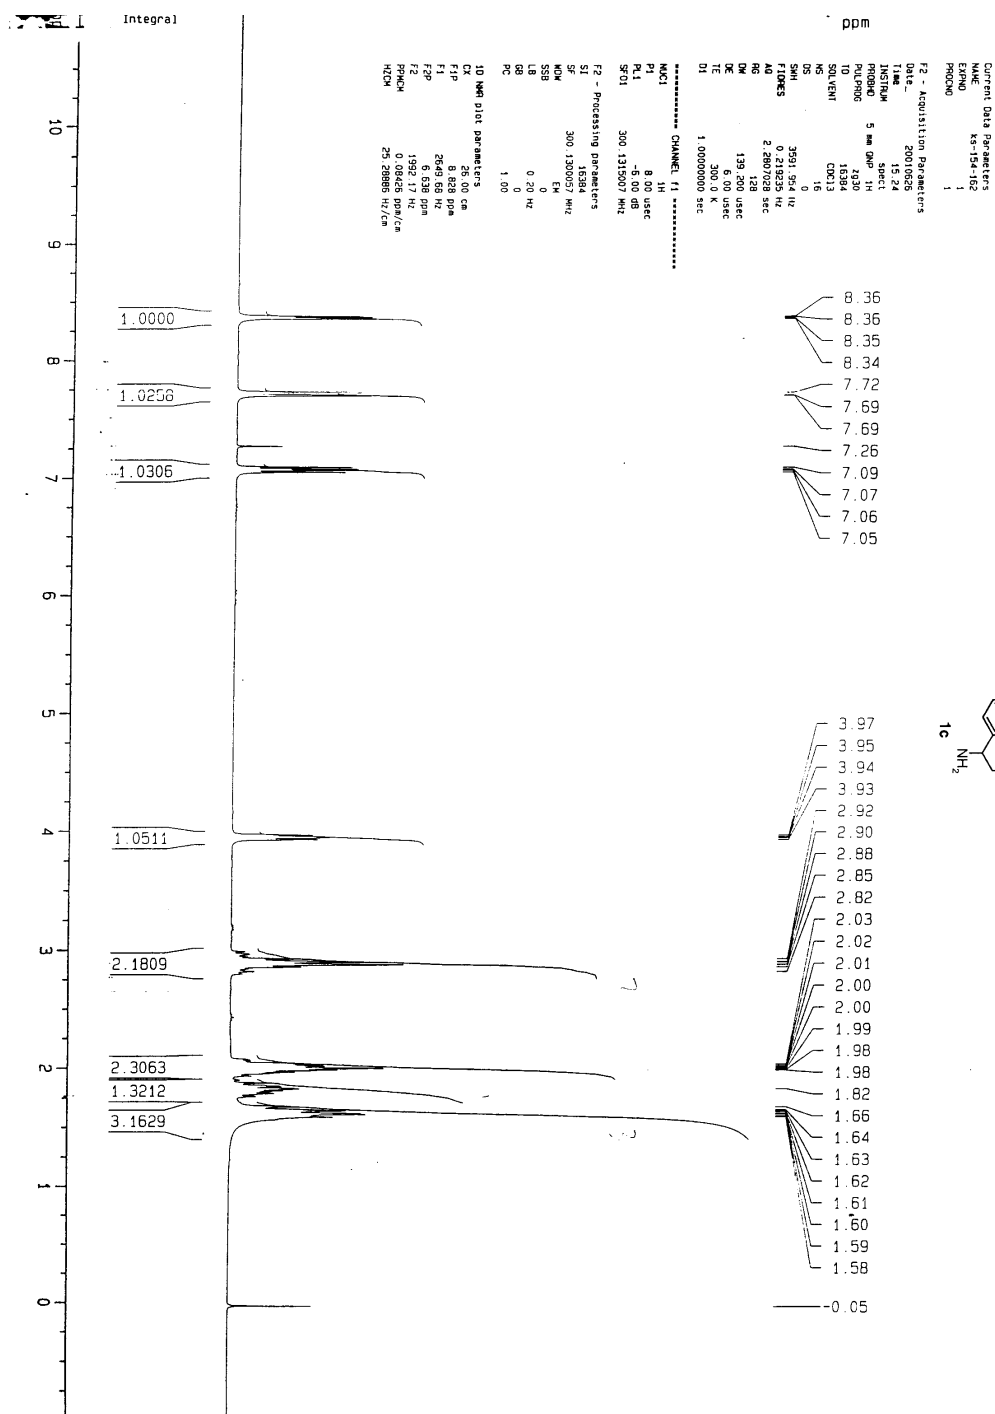

Figure 2.

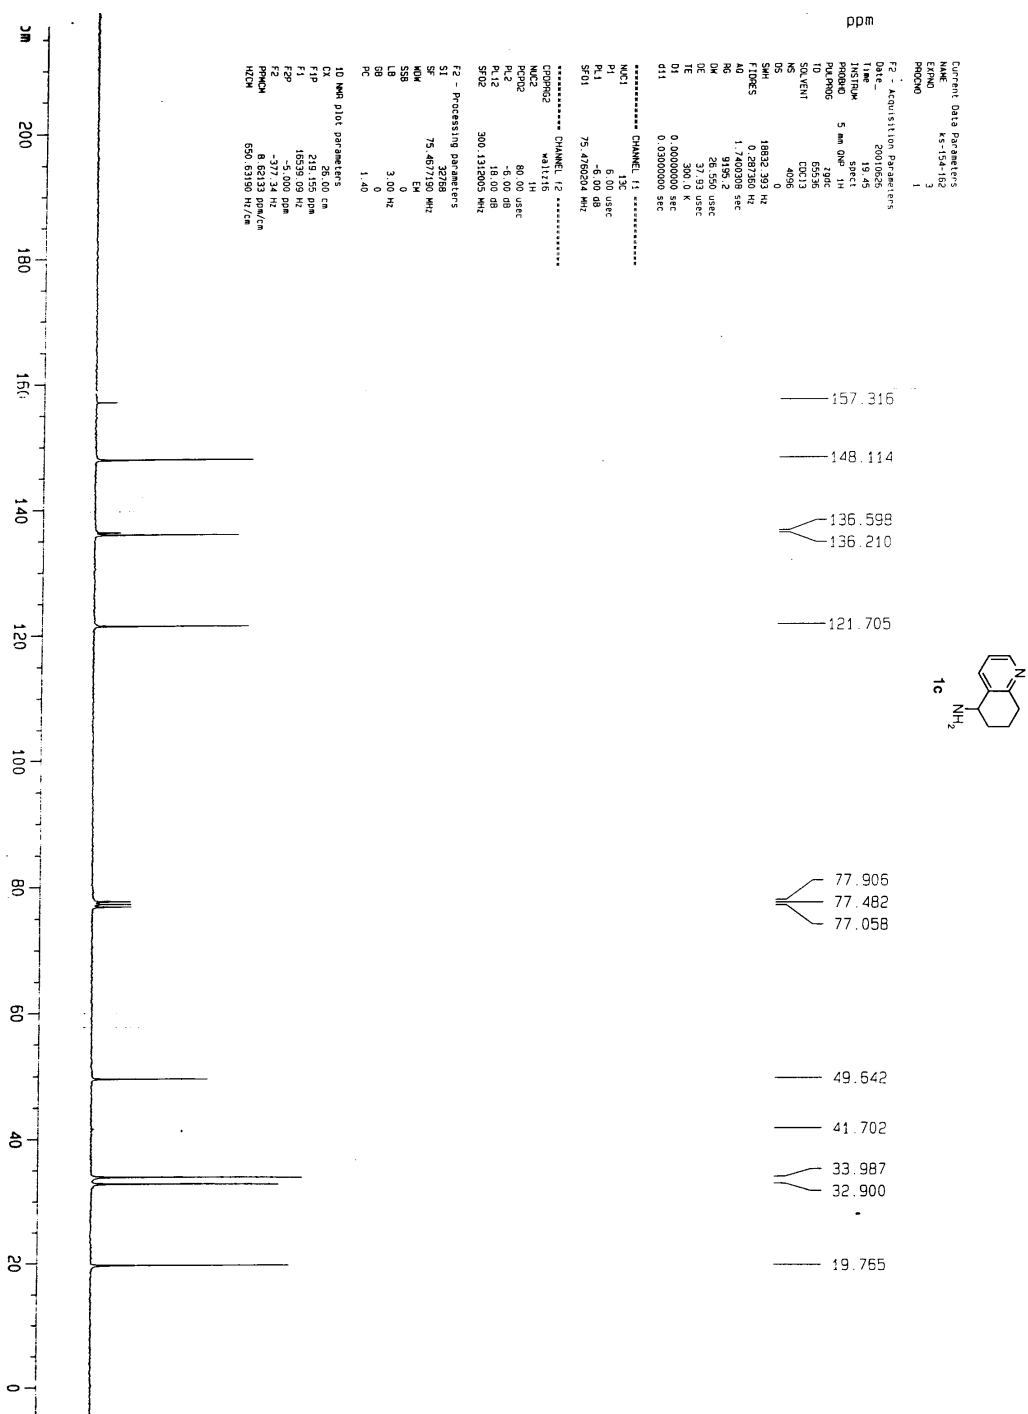



Figure 3.

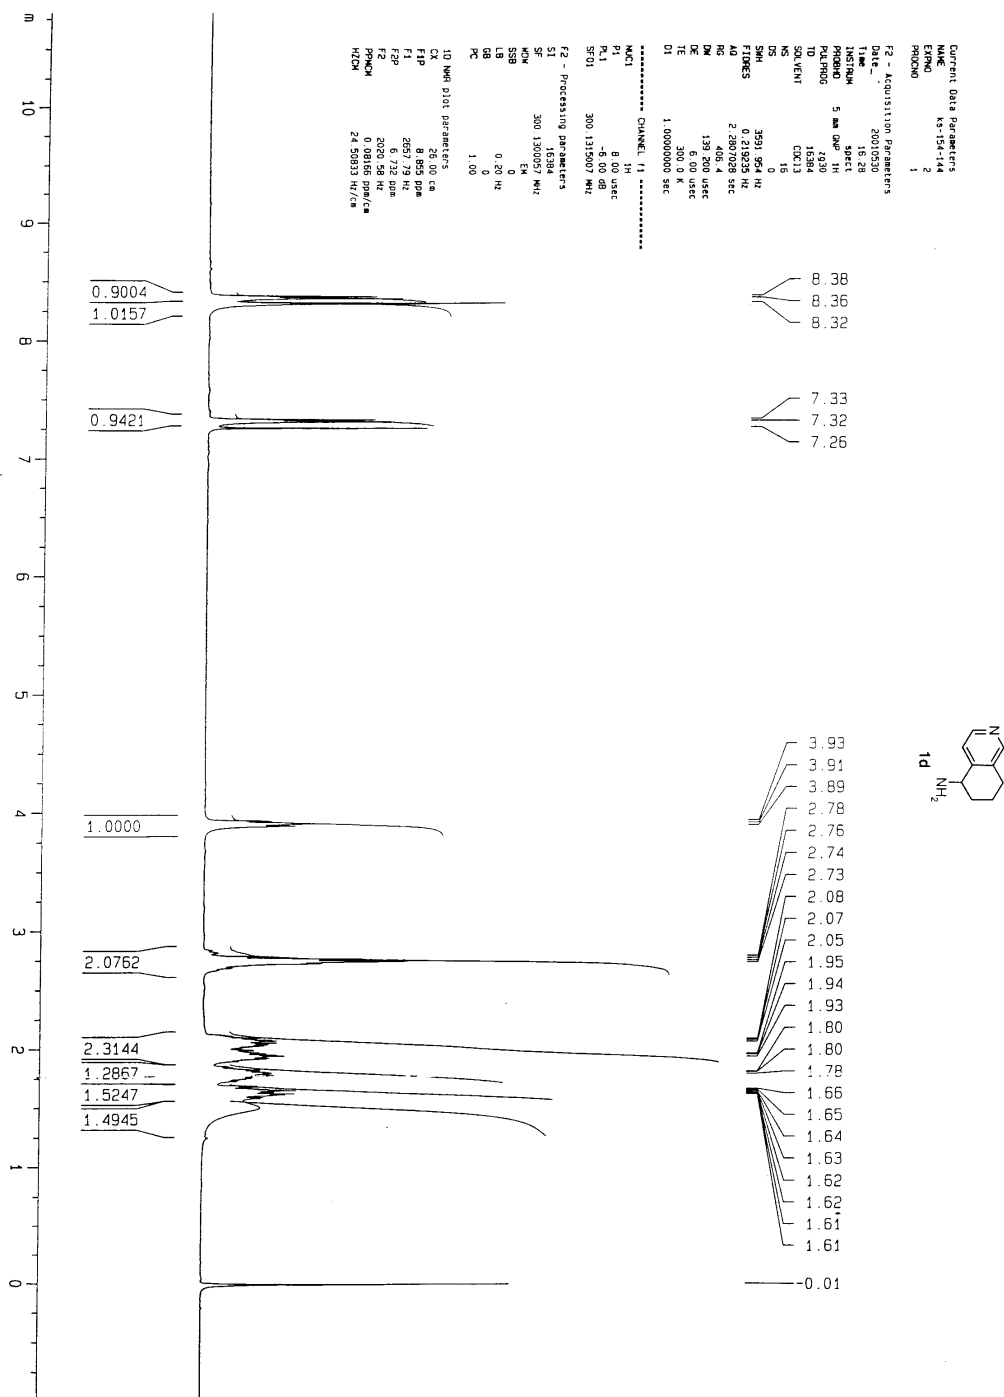

Figure 4.

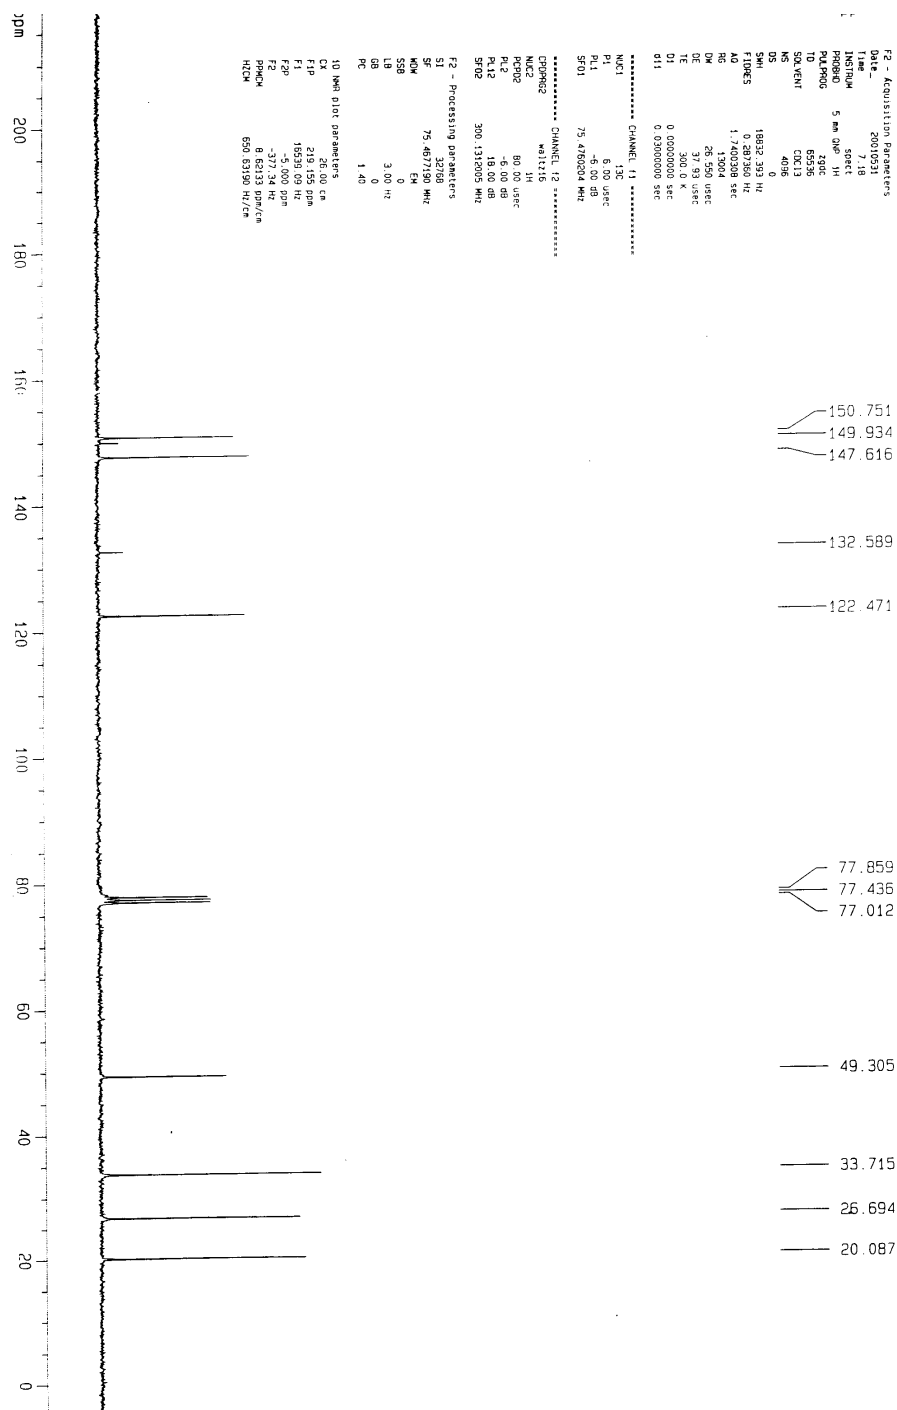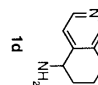

Figure 5.

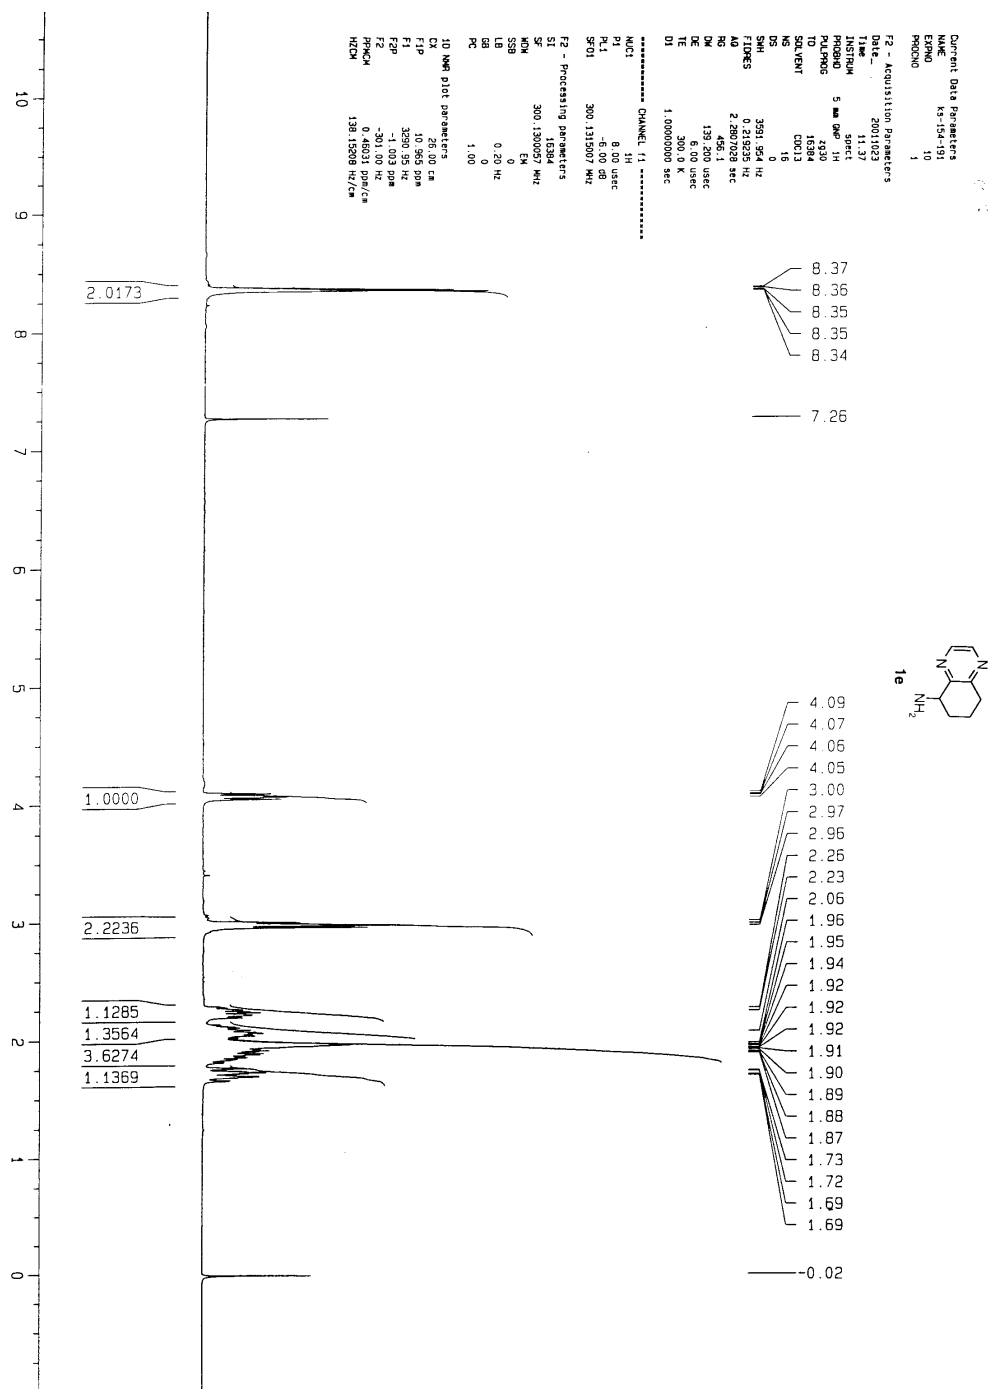

Figure 6.

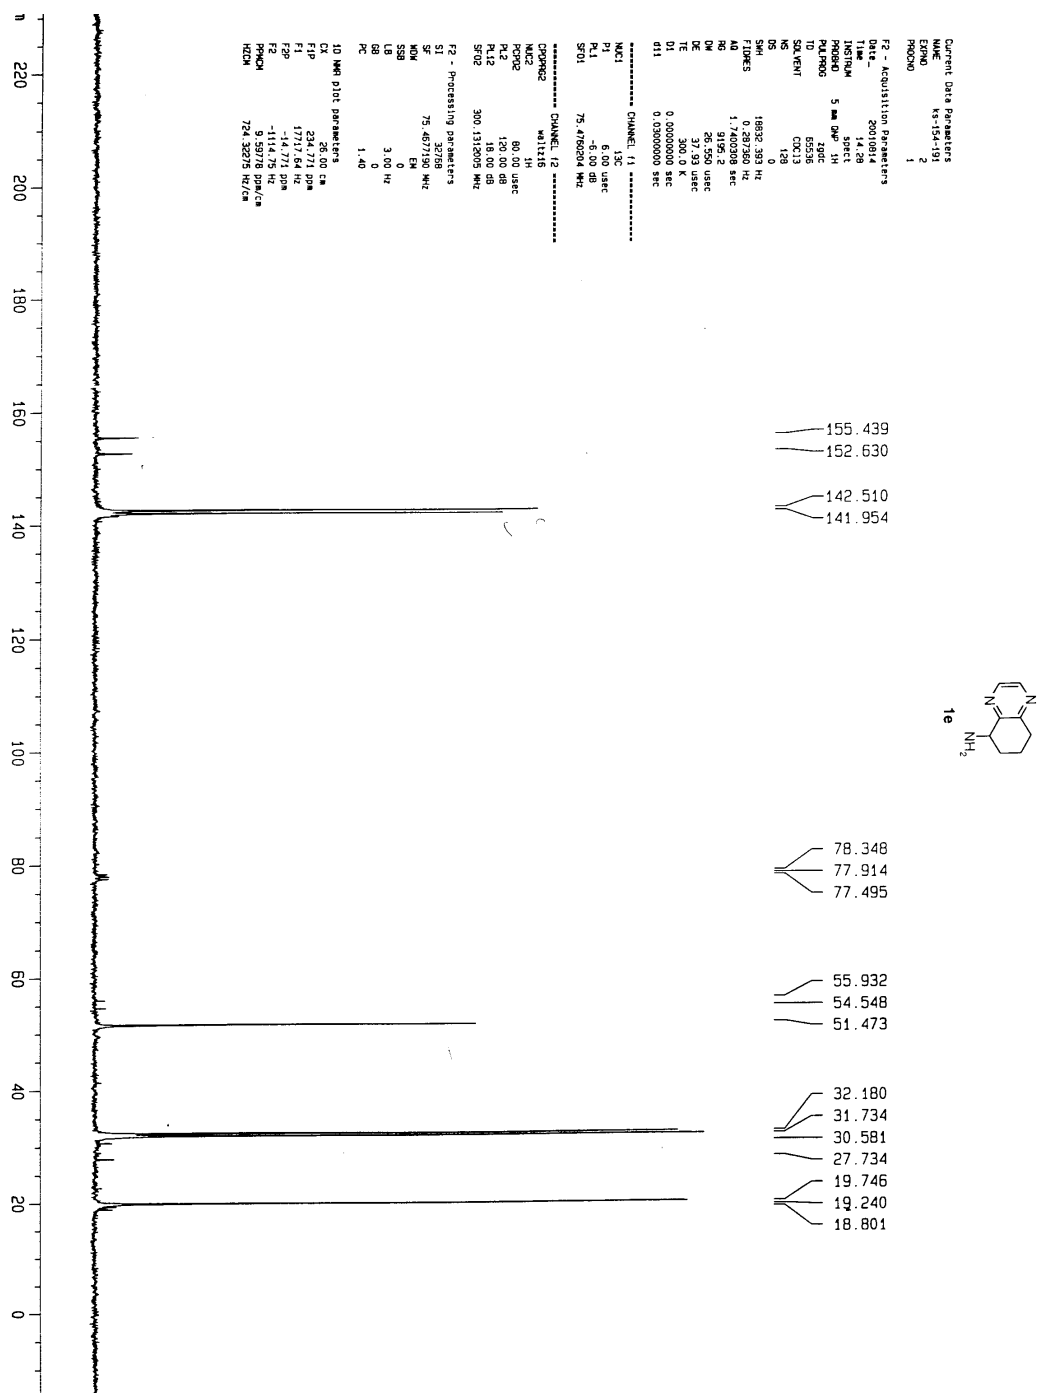

Figure 7.

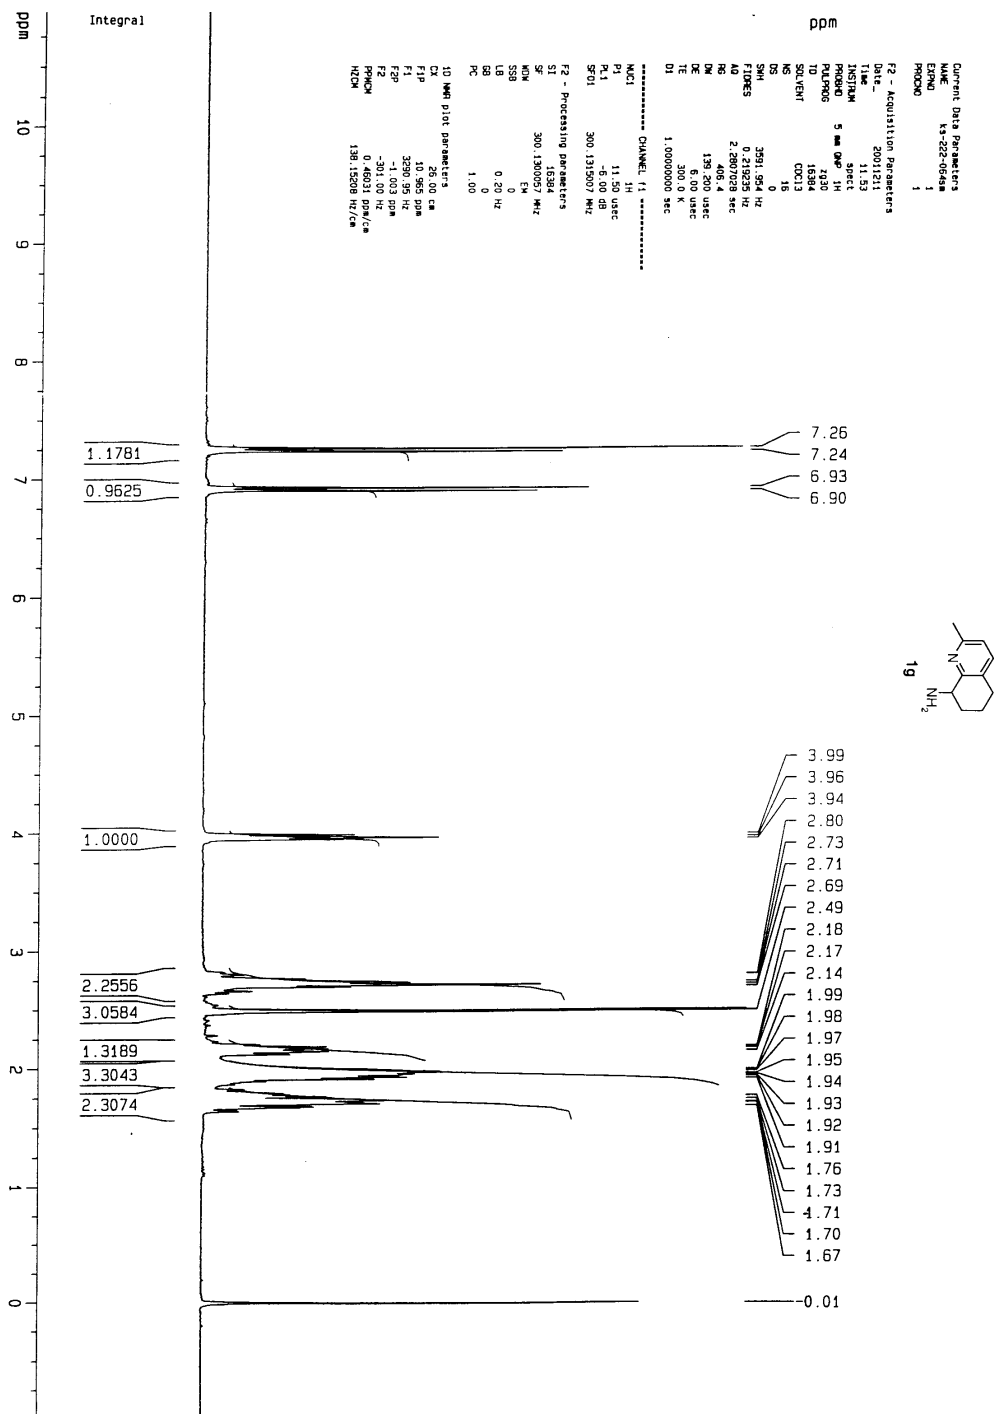

Figure 8.

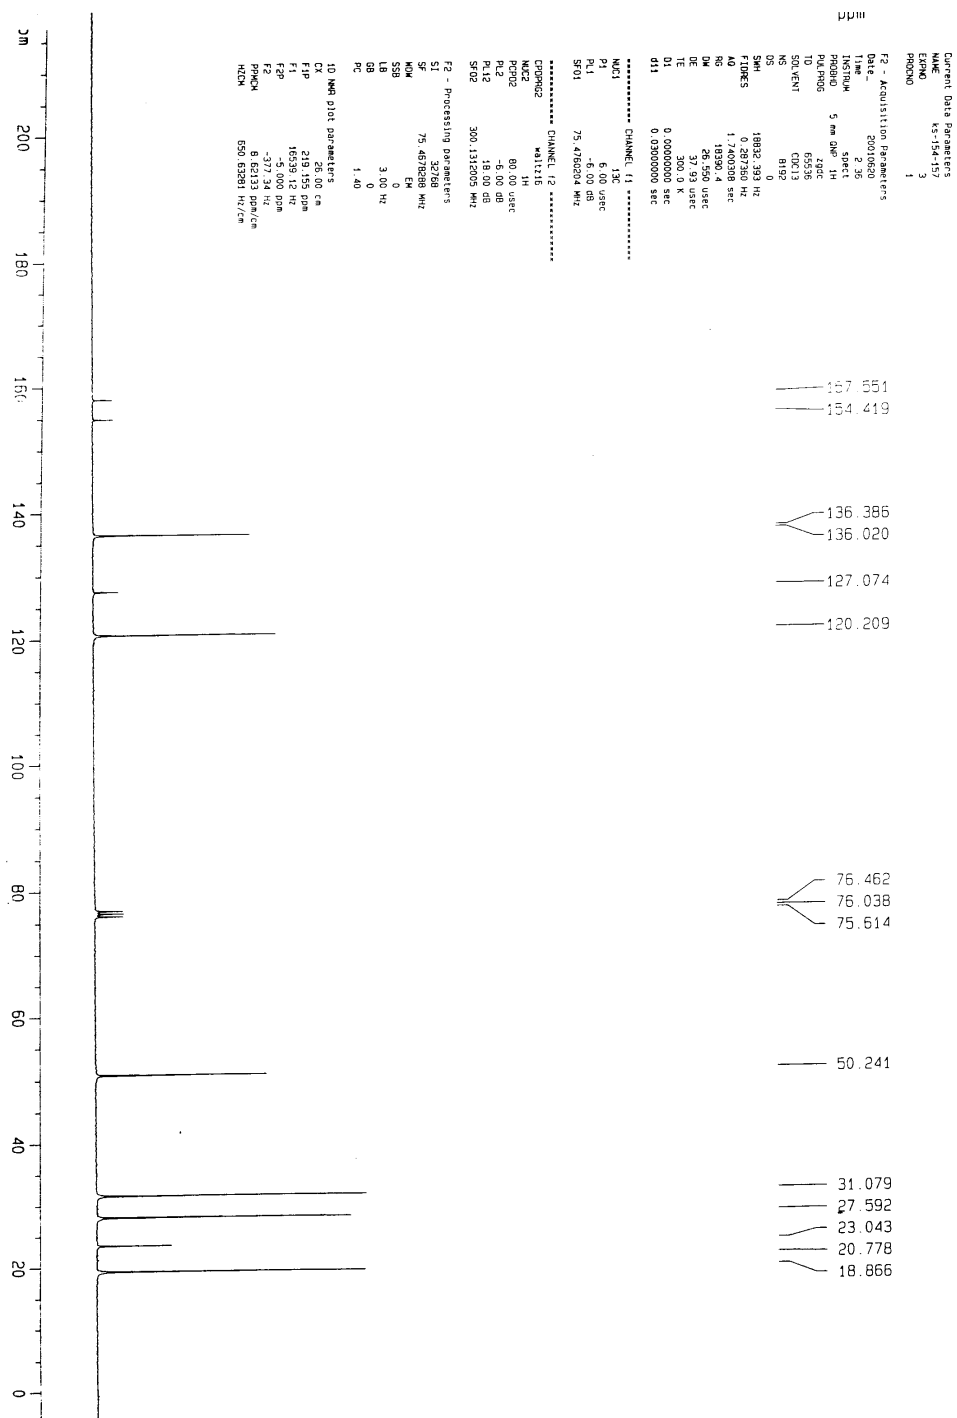

Figure 9.

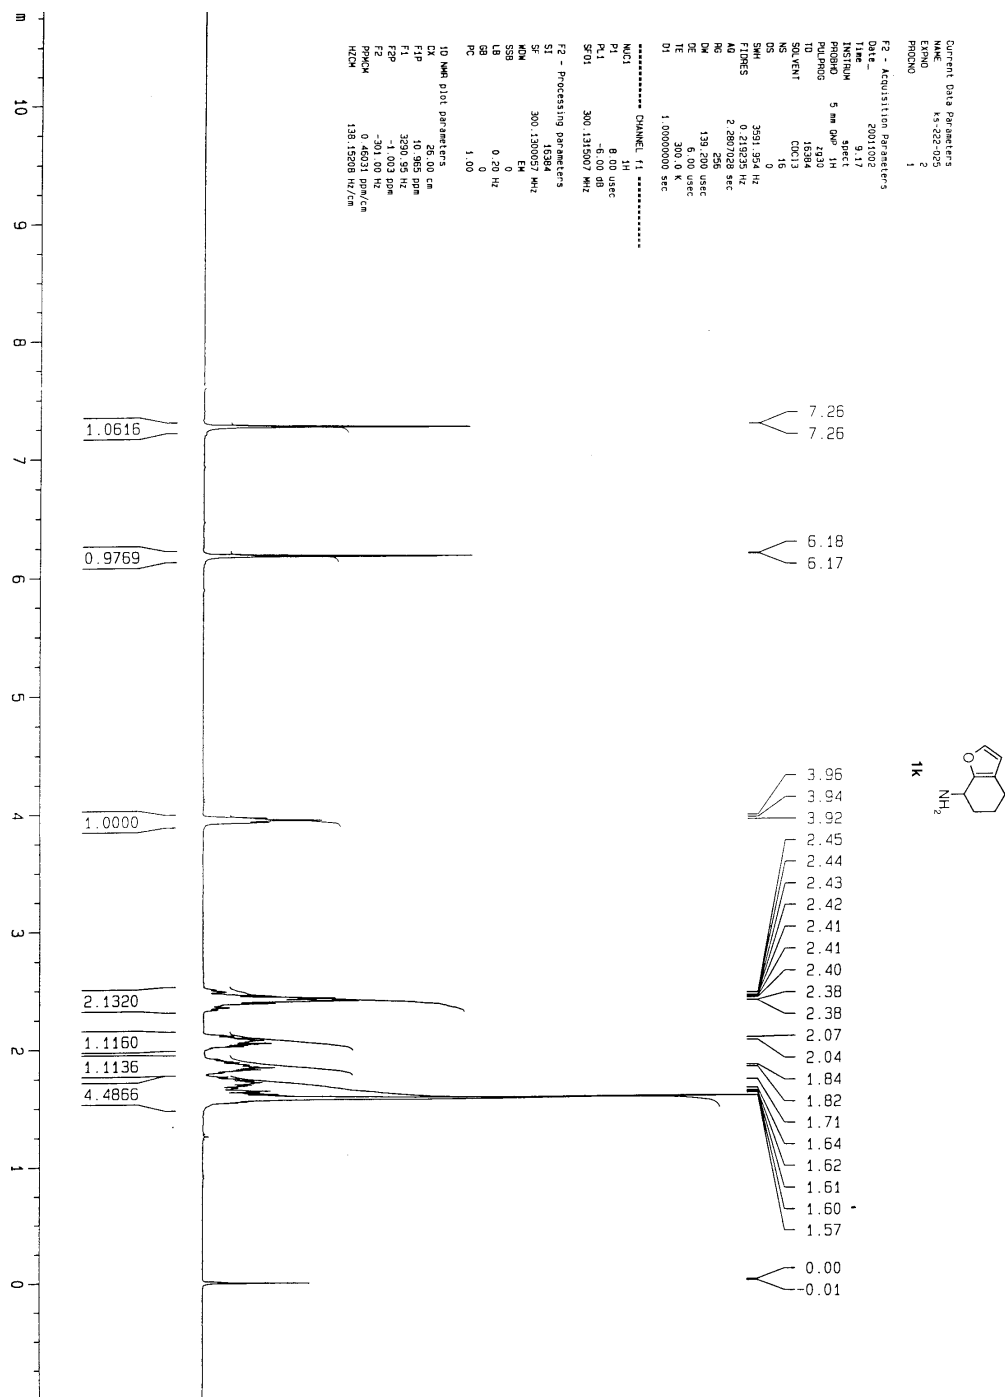

Figure 10.

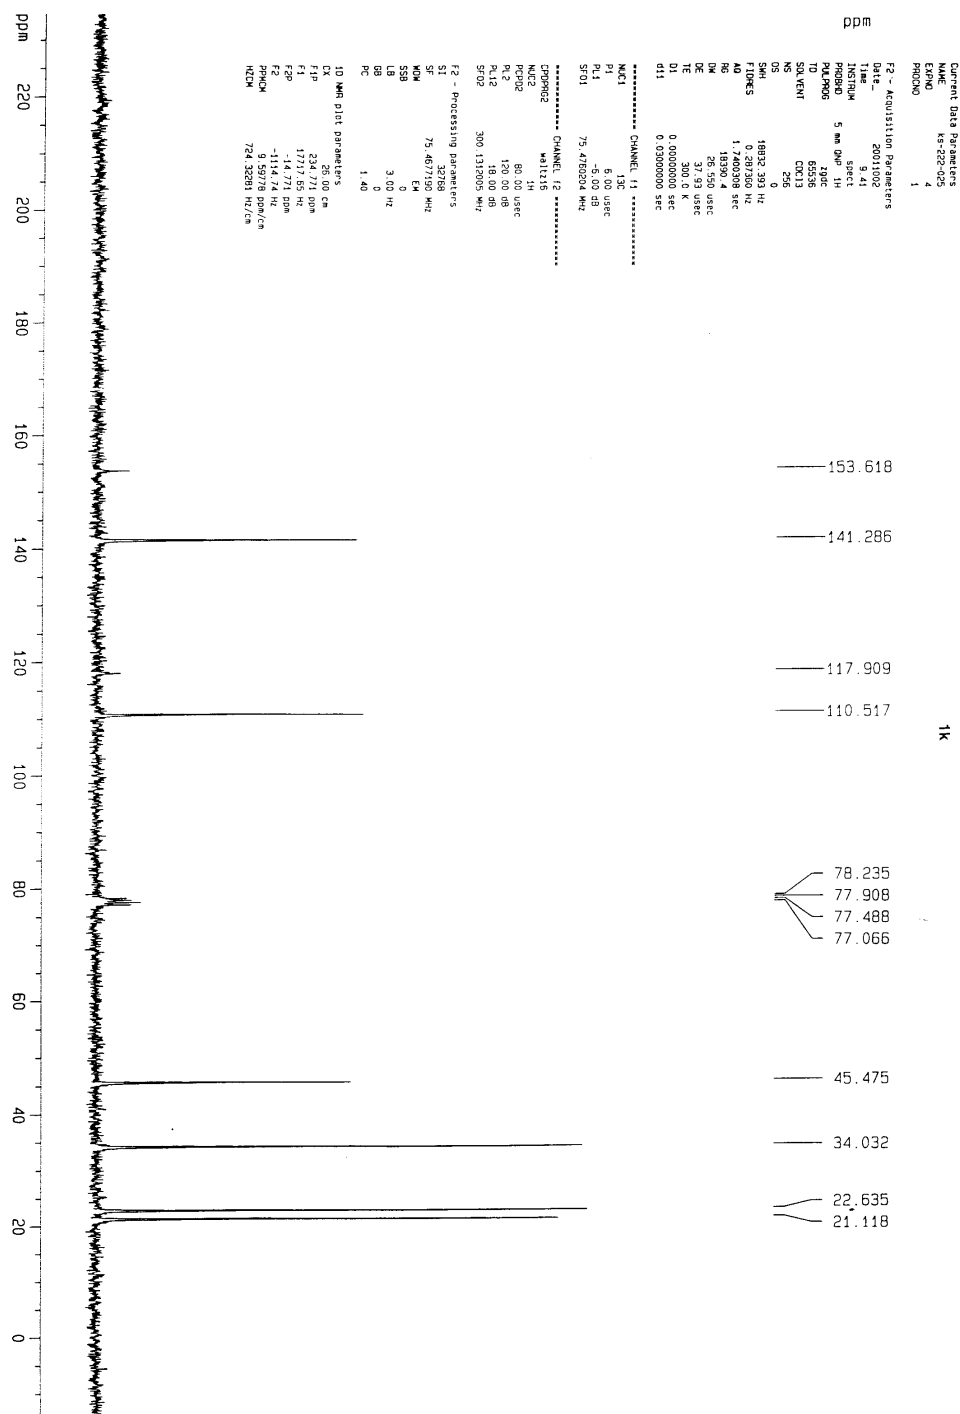



Figure 11.

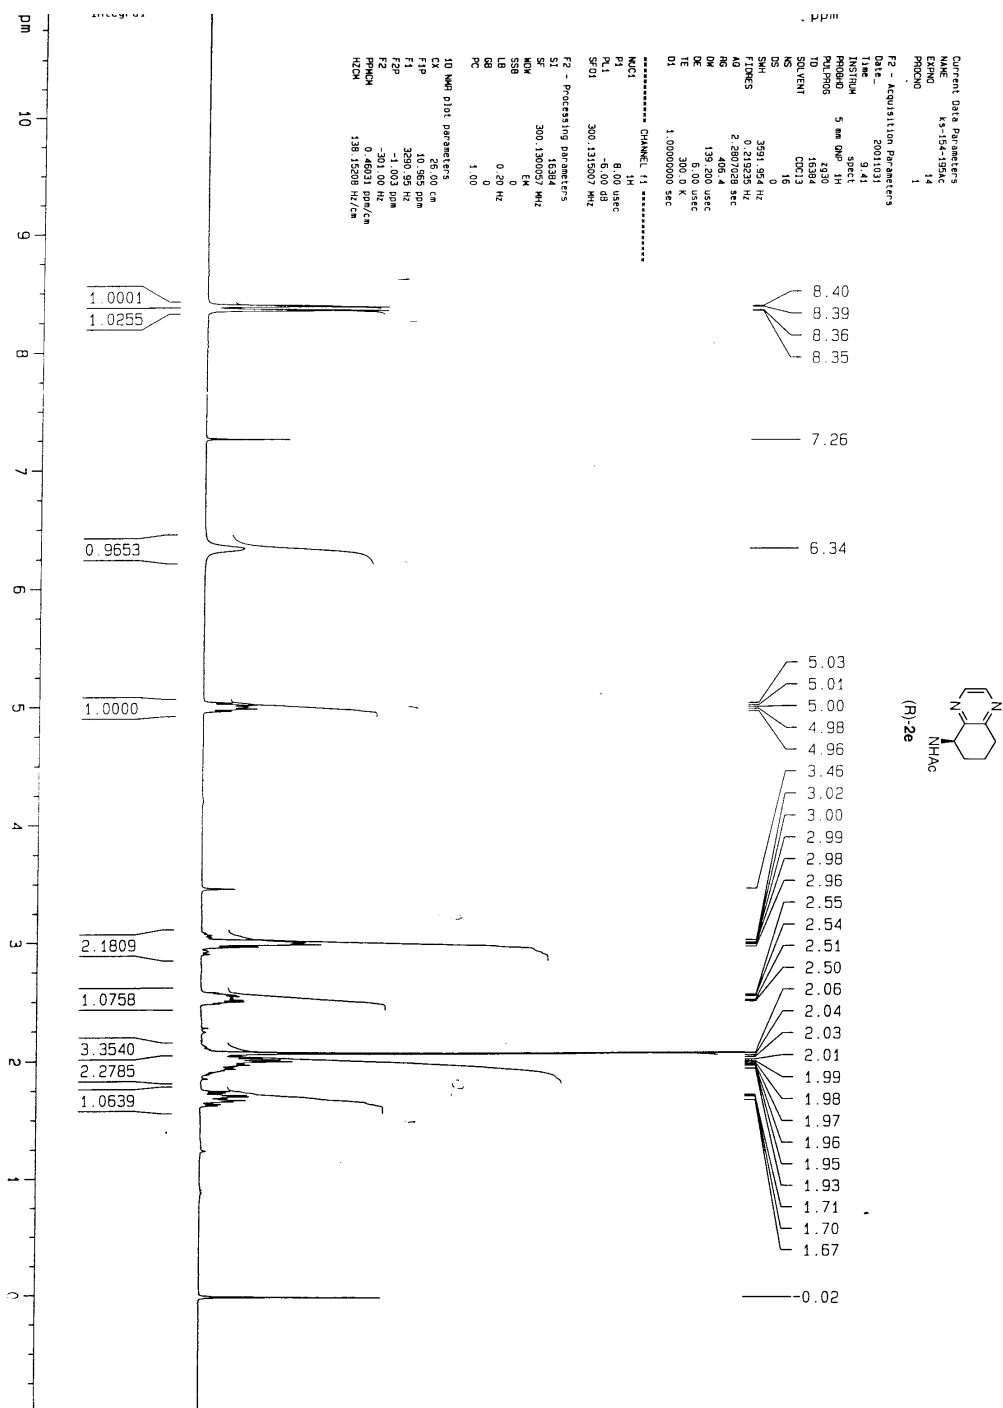

Figure 12.

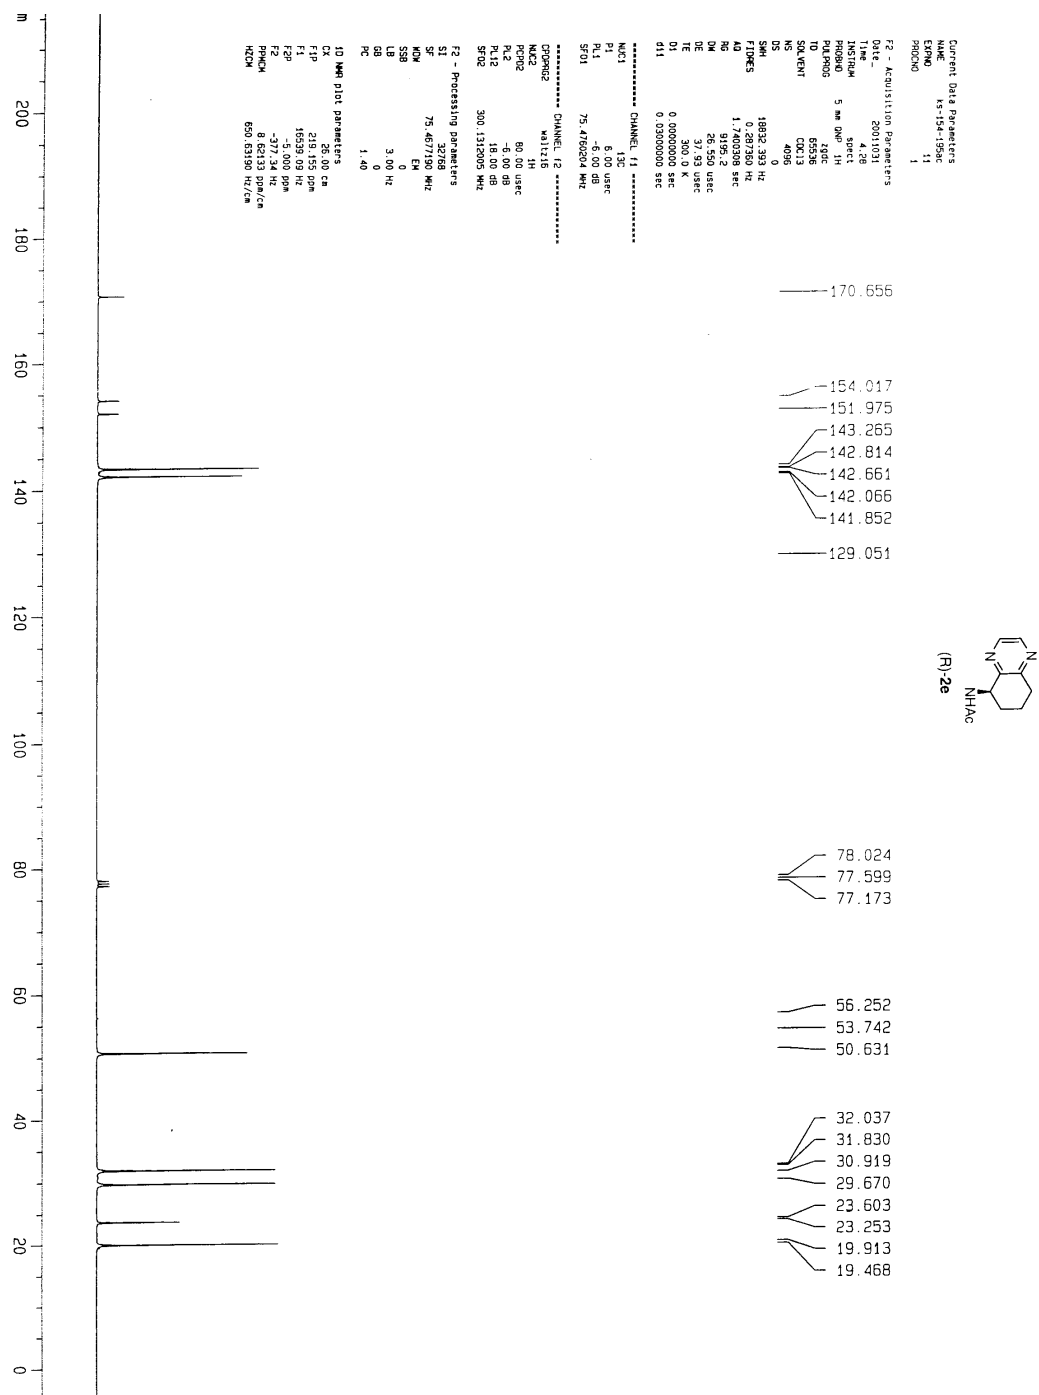

Figure 13.

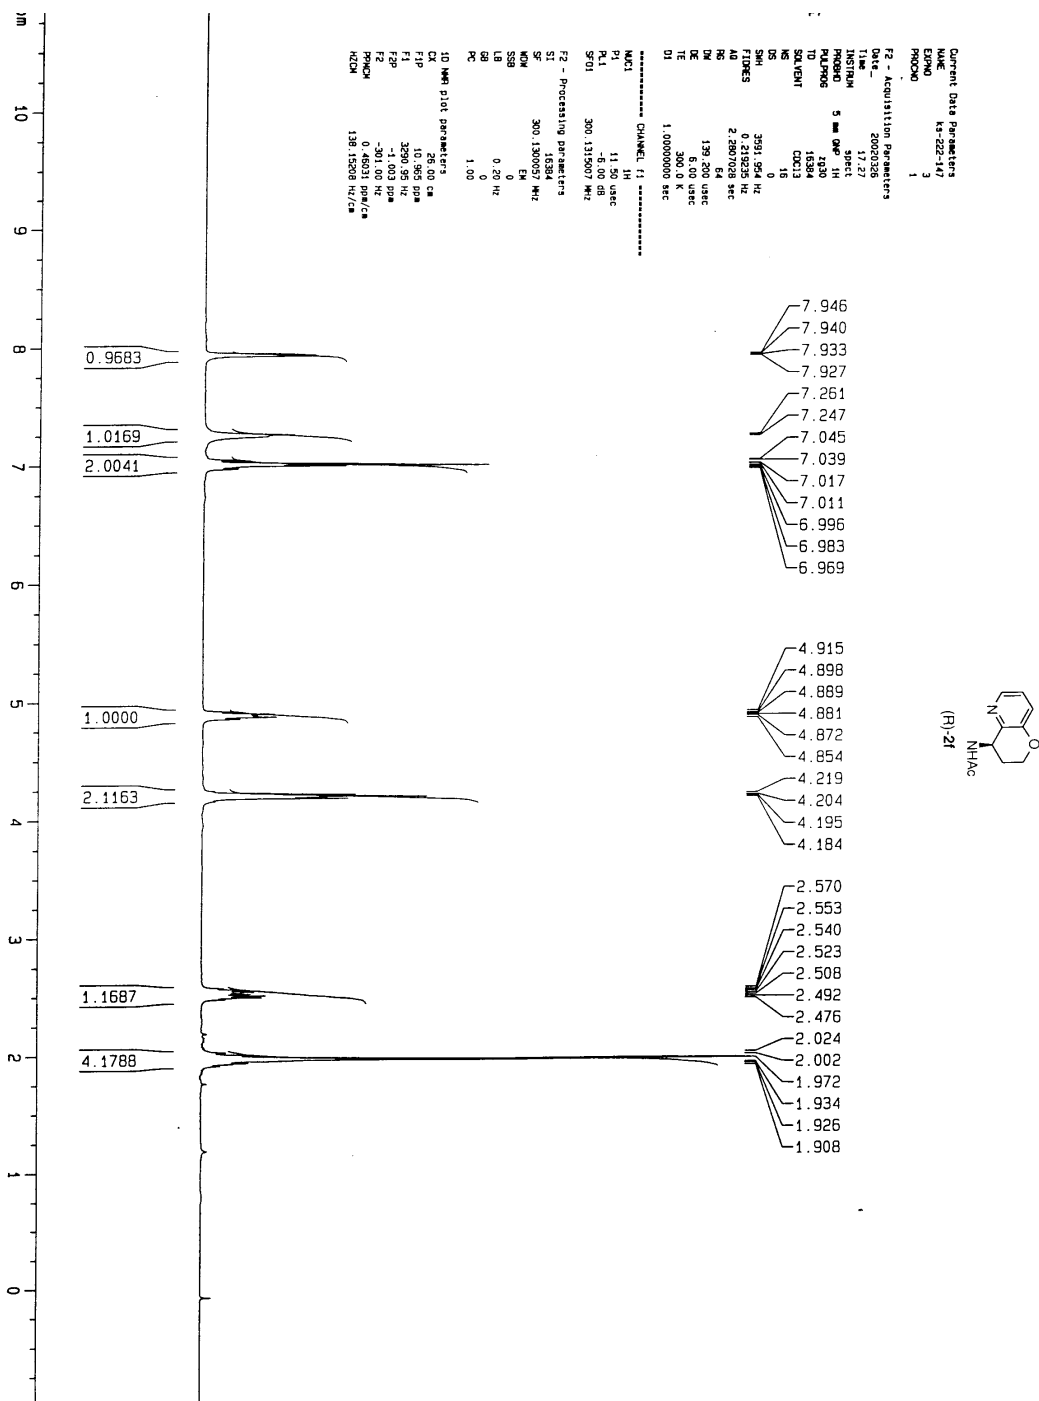

F2 - Acquisition Parameters

Date\_ Time\_ 20060721 14:21  
INSTRUM spect  
PROBHD 5 mm QNP 1H  
PULPROG zgpg  
TD 65536  
SOLVENT CDCl3  
NS 4095  
DS 0  
SWH 1882.355 Hz  
FIDRES 0.1432350 Hz  
AQ 1.7400395 sec  
RG 18390.4  
NUC1 26.550 usec  
DE 37.93 usec  
TE 300.2 K  
D1 0.00000000 sec  
d11 0.03000000 sec

===== CHANNEL f1 =====  
NUC1 13C  
P1 6.00 usec  
PL1 -6.00 dB  
SFO1 75.4756204 MHz

===== CHANNEL f2 =====  
CPROG2waltz16  
NUC2 1H  
PCPRG2 80.00 usec  
PL2 -6.00 dB  
PL12 18.00 dB  
SFO2 300.135095 MHz

F2 - Processing parameters

SF 32768 MHz  
WDW 75.467724  
SSB 0  
LB 3.00 Hz  
GB 0  
PC 1.40

10 NMR plot parameters

CX 26.00 ca  
FLP 219.155 ppm  
F1 165.550 MHz  
F2 -377.34 Hz  
PPMCH 8.62133 ppm/ca  
HZCN 650.63196 Hz/ca

170.951

152.038

141.713  
141.313

125.157  
124.733  
124.344

77.976  
77.551  
77.125

64.438  
63.573

49.745  
47.215

30.457  
29.874  
28.892  
23.285

Figure 15.

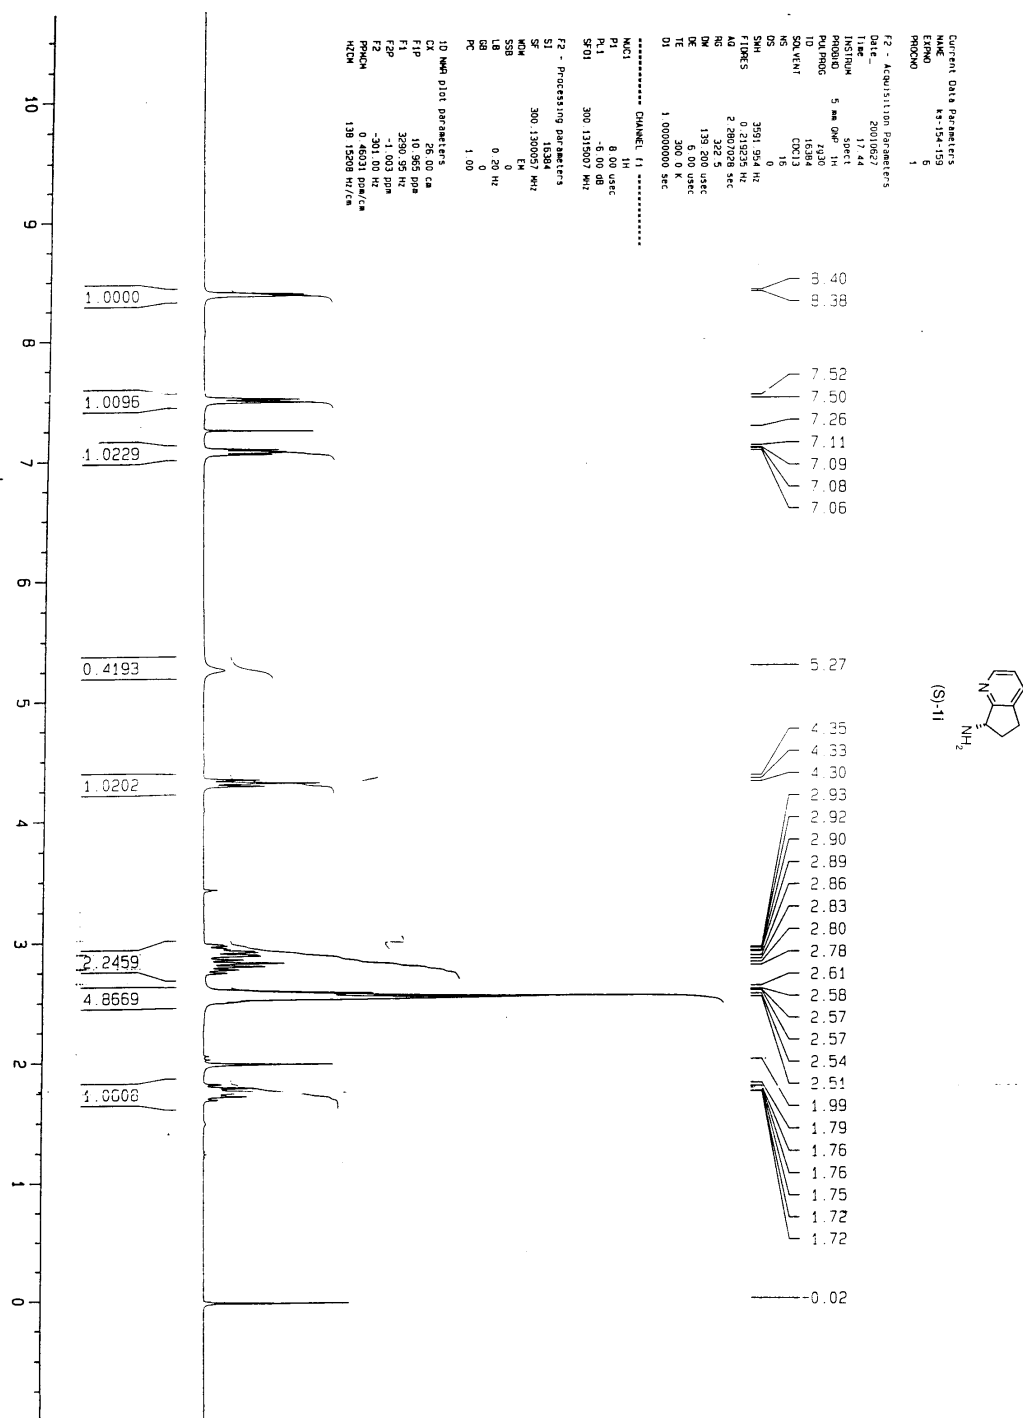

Figure 16.

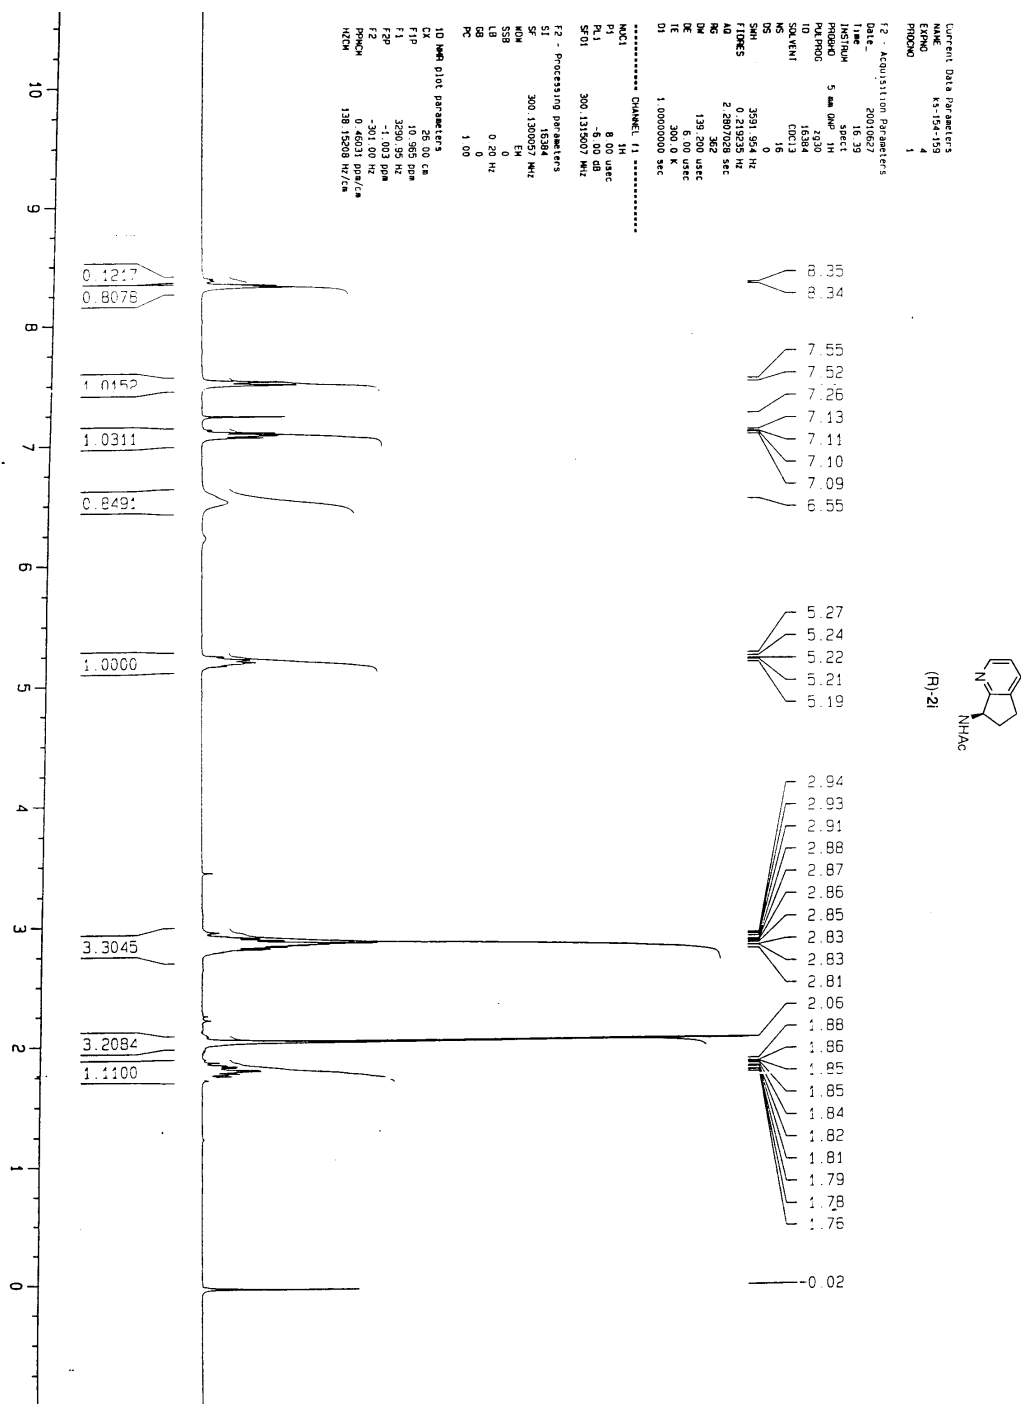

Figure 17.

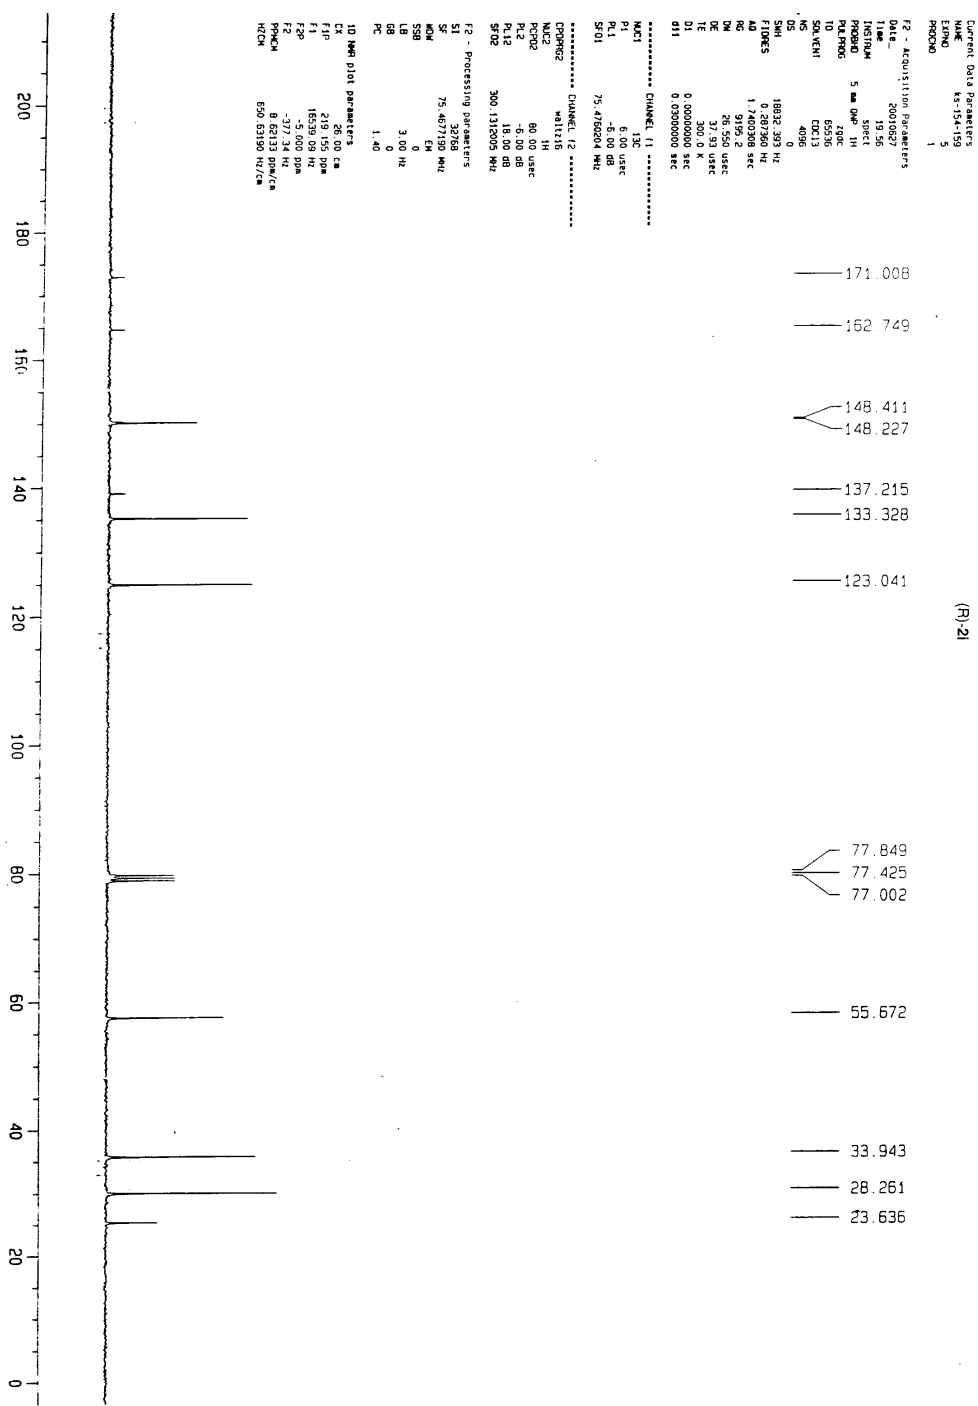

Figure 18.

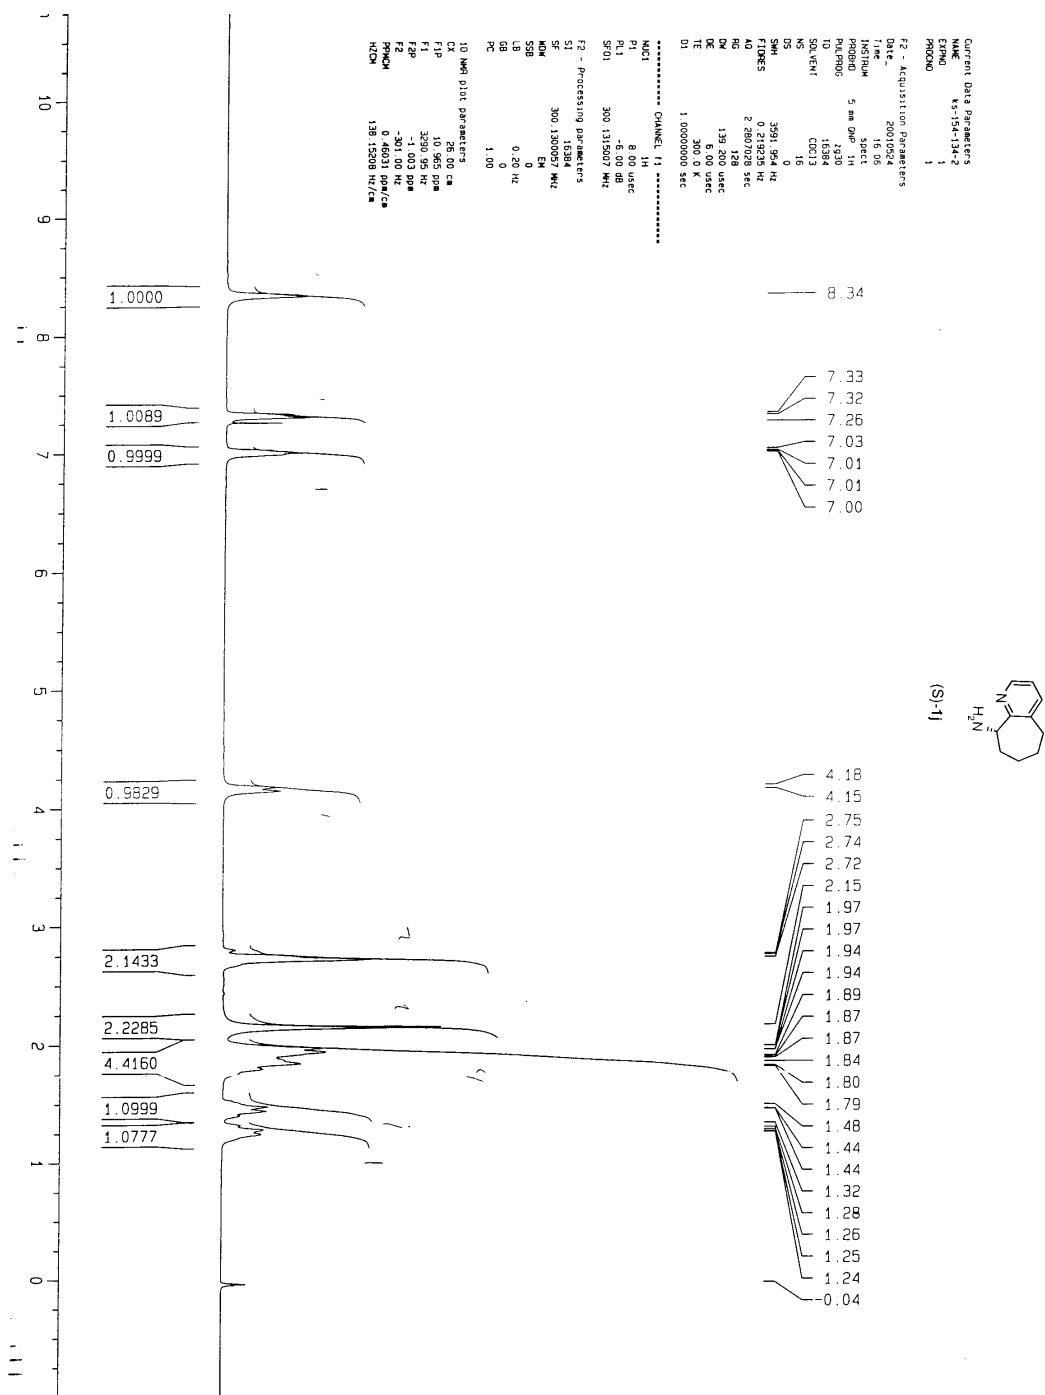



Figure 19.

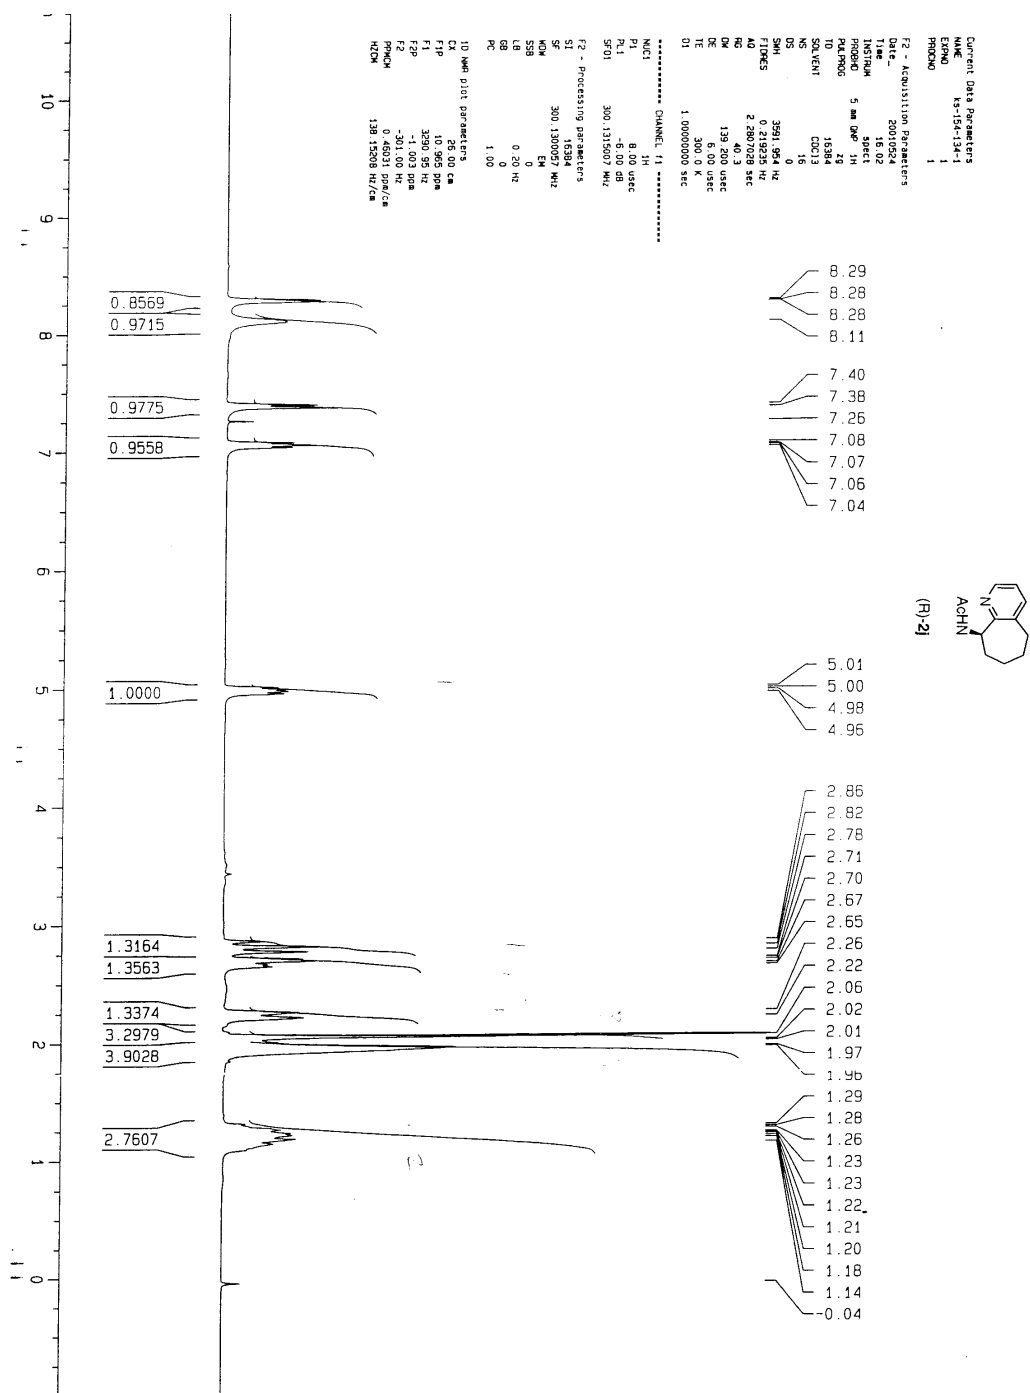

Figure 20.

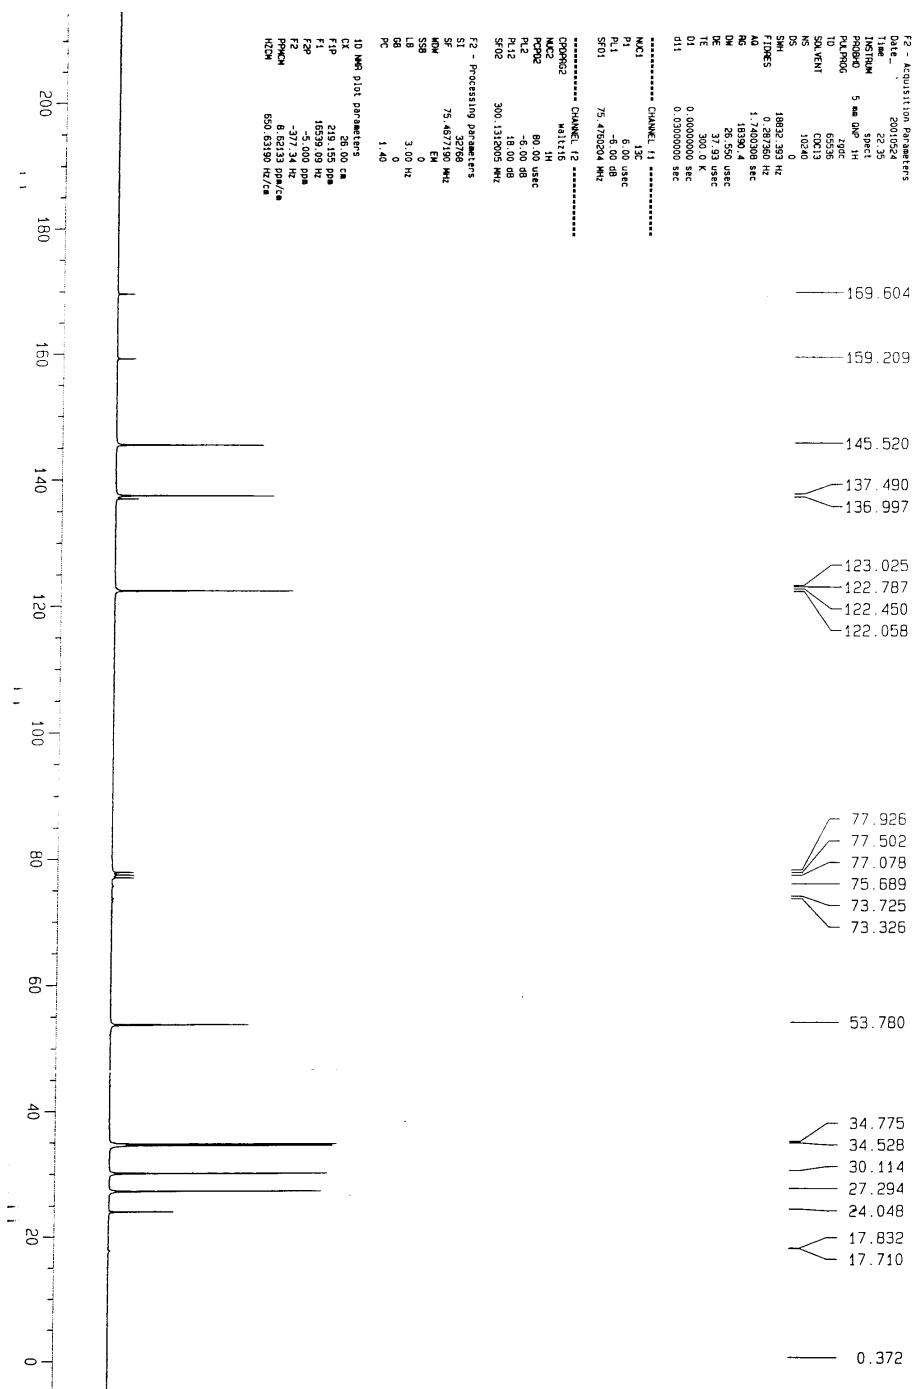

Figure 21.

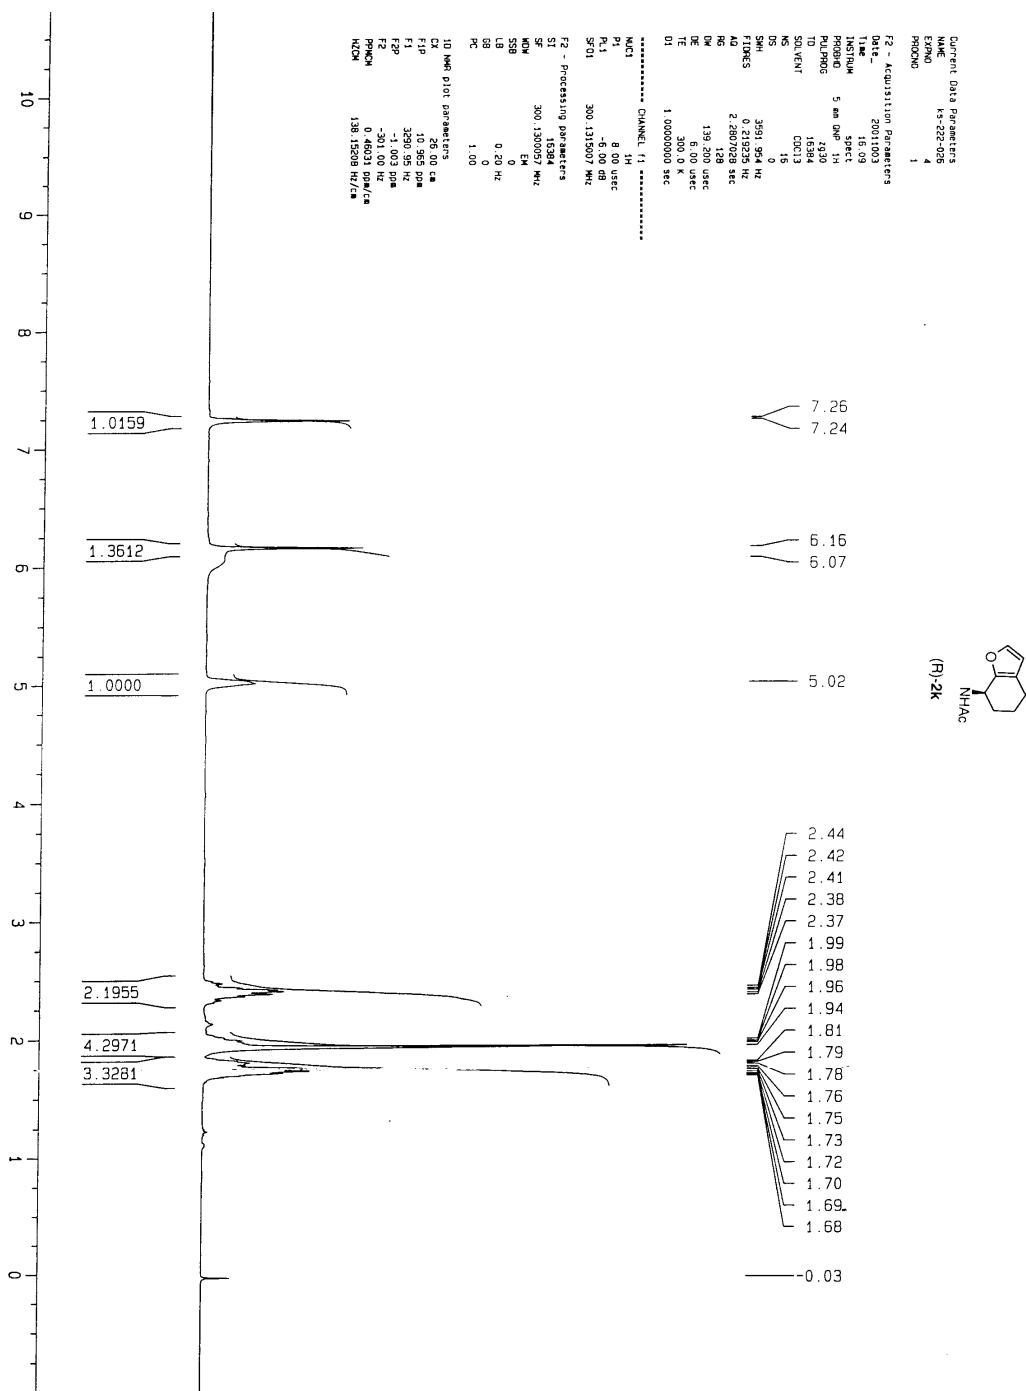

Figure 22.

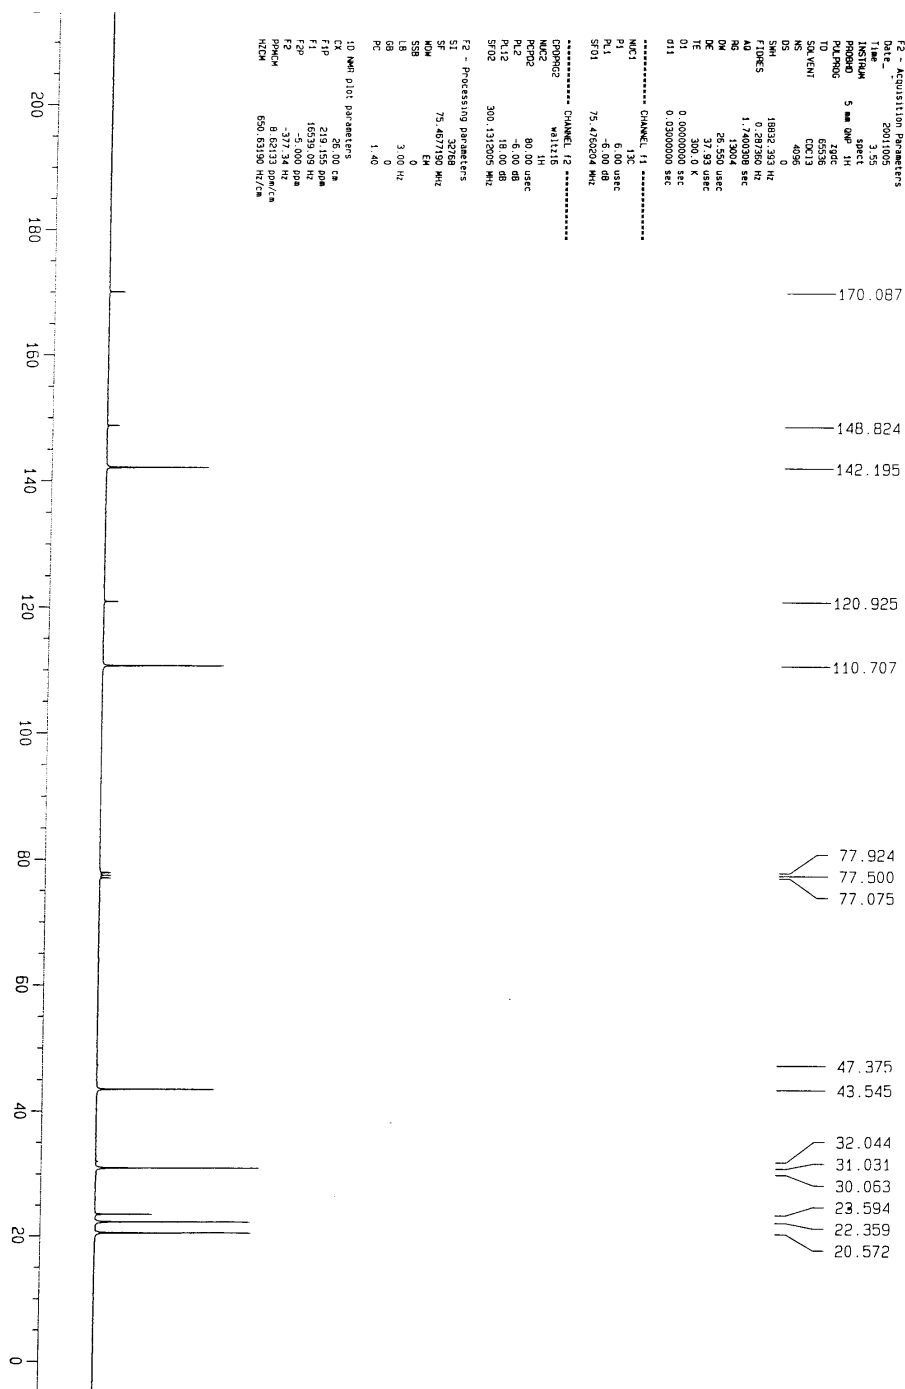

Figure 23.

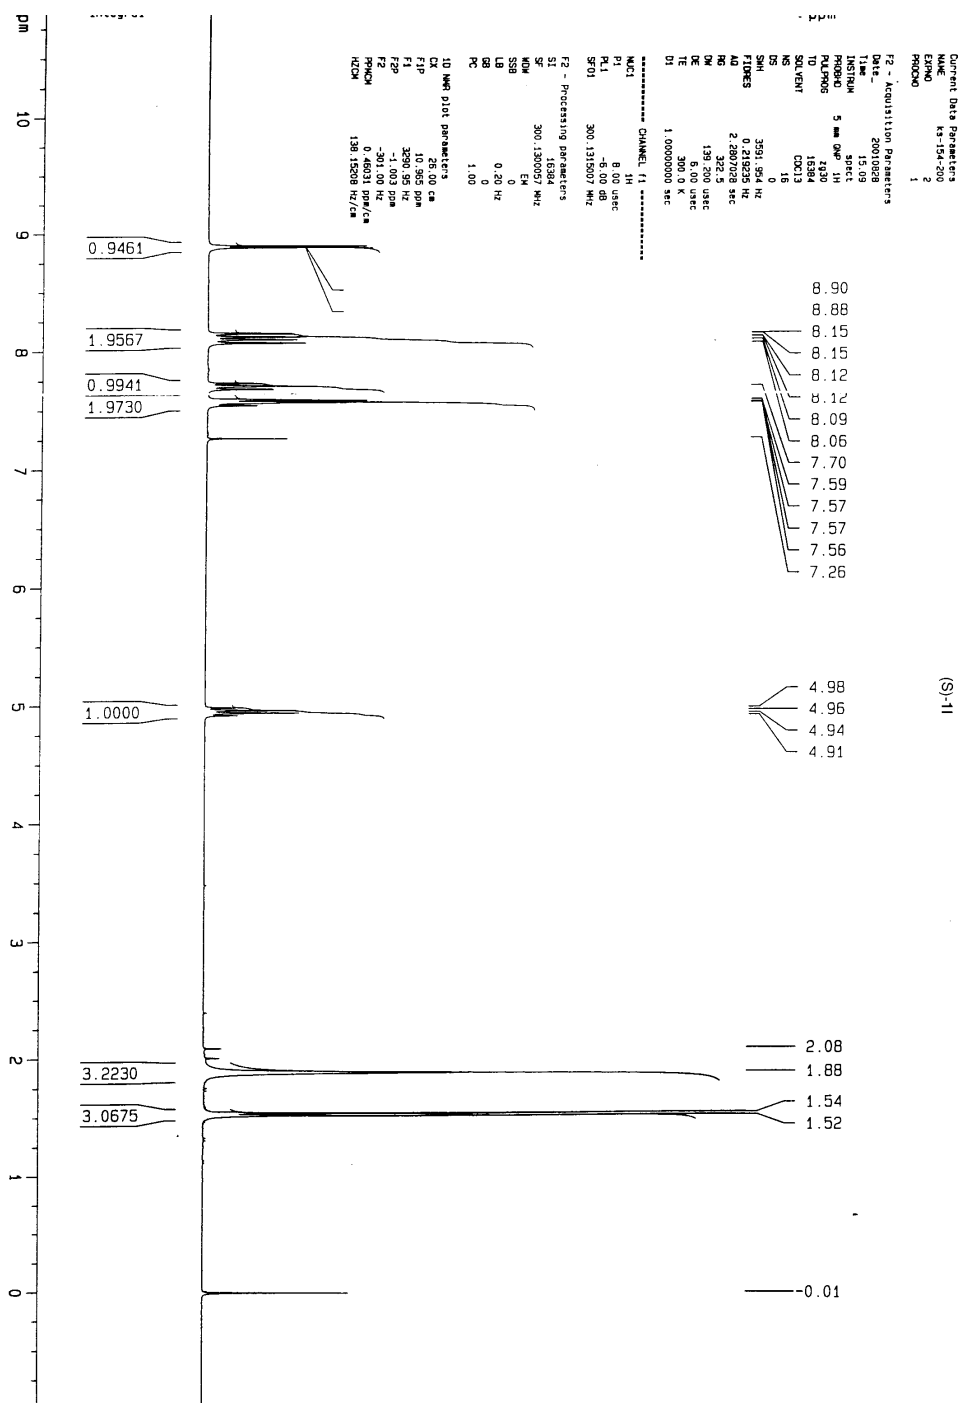

Figure 24.

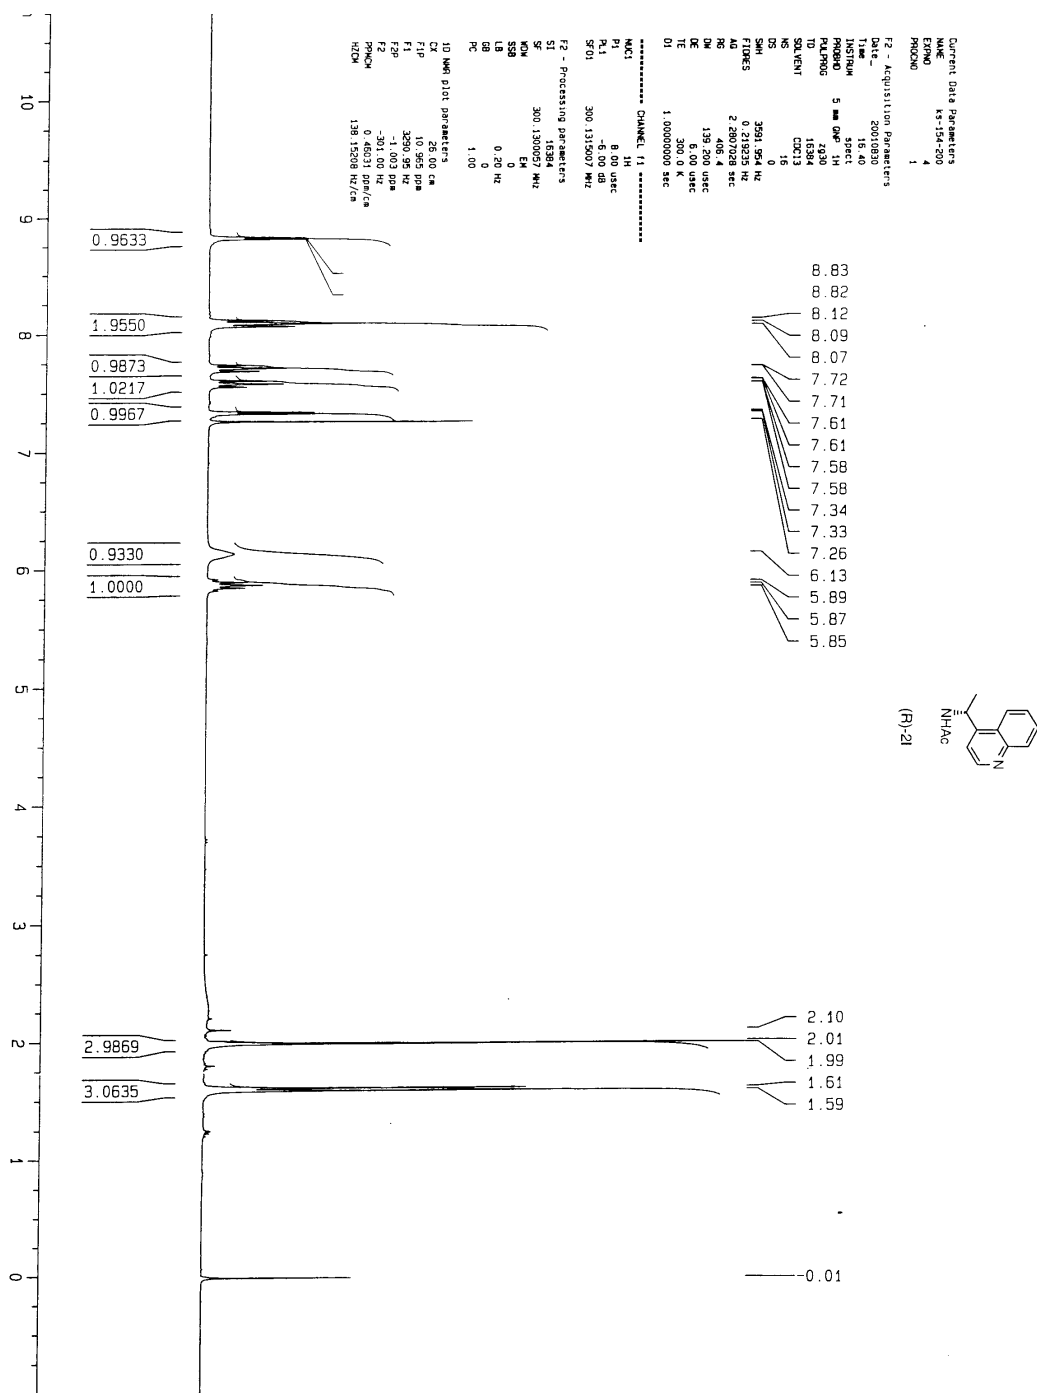

Figure 25.

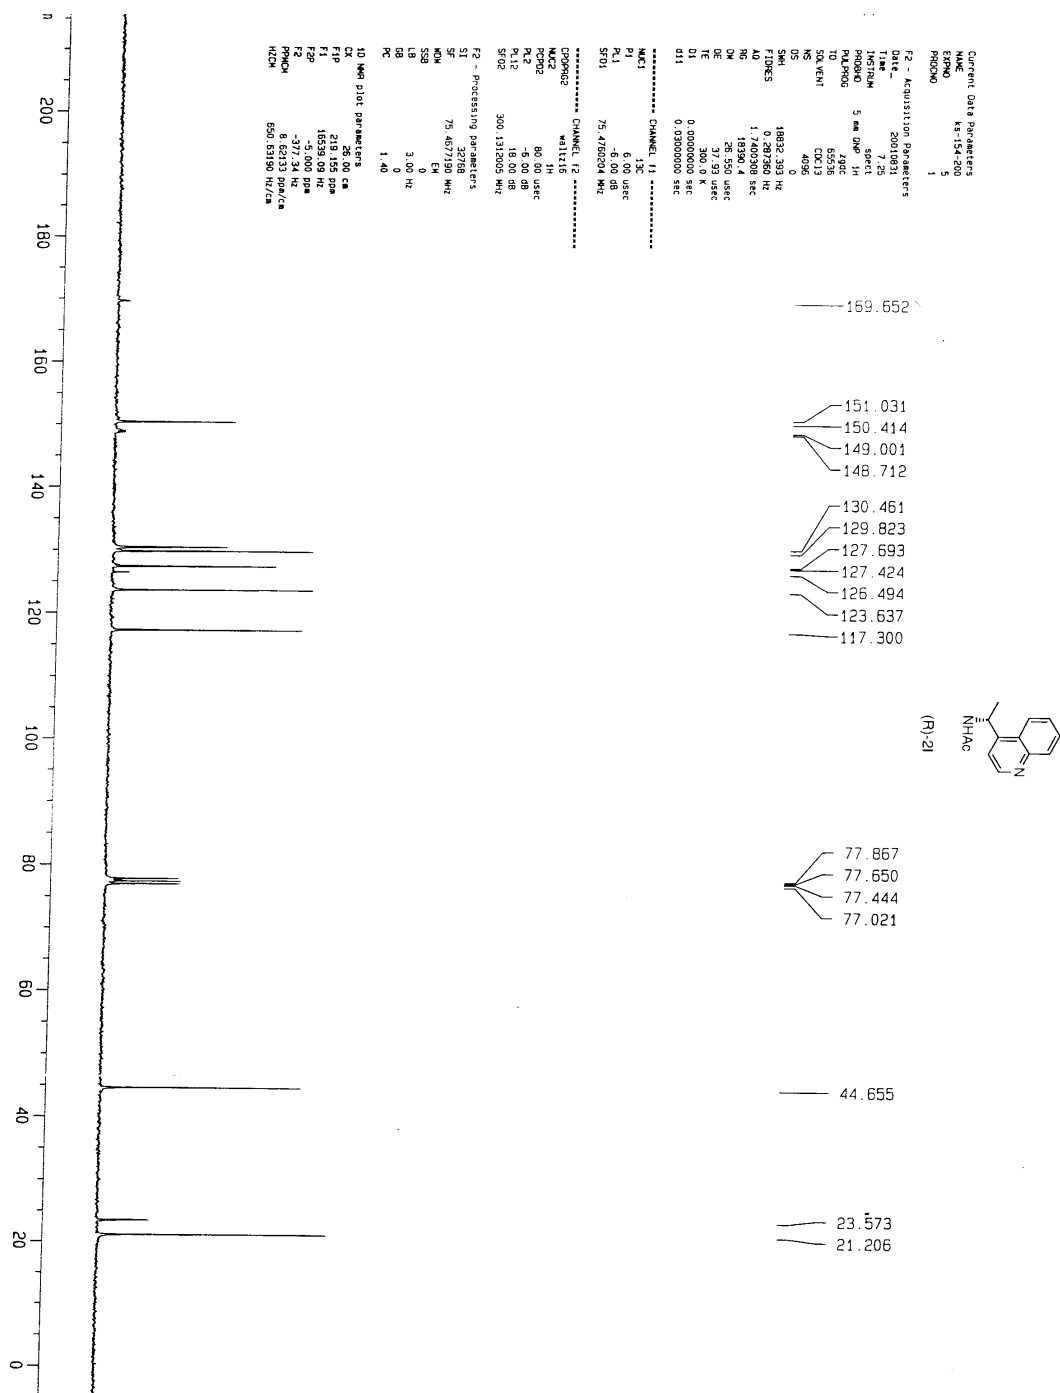

Supplement: Supplementary file 1 [file 5787858]
